# Supplementary material
Source: publisher figshare collection journal article supplement (https://sage.figshare.com/ndownloader/files/16587944)
Supplement: Supplementary file 1 [file 16587944]

## Sheet: Read Me
Age model procedures
1. Calib 7.10 and IntCal13 was used to correct radiocarbon ages
2. Corrected RC ages were plotted along with a linear trend line of the data
3. The "Age bottom ybp 1950" column is the equation of the linear trend line solving for x
4. The "Age top ybp 1950" is a a linear trend line with a different slope. This is necessary because the top of the age model from step 3 does not make sense because the age model canot contain dates after -64 years BP 1950 since the cores were taken in 2014
5. "Age top ybp 1950" is calculated by adding 64 to the age from "Age bottom ybp 1950" that is closest to the most recent RC point calculated in step 1 (this row is highlighted in yellow for each sheet).
6. Then the number from step 5 is divided by the difference between the cm of the highlighted row and the top cm of the core for which there is data.
7. The number from step 5 is subtracted from the age that is highlighted and put in the new "Age top ybp 1950" column
8. The number from step 5 is subtracted from the number from step 7 and so on until the top of the core.
Notes
The following sheets give Total Organic Matter and Magnetic Susceptibility for each core
See Table 1 for core locations, see Table 2 for radiocarbon dates used to construct age-depth models
A few spurious MS values were omitted at core breaks

## Sheet: Mattox Creek
Depth in core (cm)	meters BSL	Age bottom ybp 1950	Age top ybp 1950	Age Ybp 1950 composite	Age Ybp 2014	TOM	MagSusc (SI Units)
58	-0.58	-140.167	-63.986	-63.986	0.014	17.2234	-3.7		Slope		182.167	*core taken in 2014
59	-0.59	-131.833	-58.11	-58.11	5.89	17.7602	-5.1		y=-.0012x-0.7482		5.87634
60	-0.6	-123.5	-52.234	-52.234	11.766	15.5026	-4.1		x=(y+0.7482)/(-0.0012)
61	-0.61	-115.167	-46.358	-46.358	17.642	15.5235	-4.3
62	-0.62	-106.833	-40.482	-40.482	23.518	15.9675	-2.9						-0.955	112
63	-0.63	-98.5	-34.606	-34.606	29.394	14.4086	-4.4
64	-0.64	-90.1667	-28.73	-28.73	35.27	16.7238	-5.2
65	-0.65	-81.8333	-22.854	-22.854	41.146	16.6139	-5.4
66	-0.66	-73.5	-16.978	-16.978	47.022	16.622	-5.2
67	-0.67	-65.1667	-11.102	-11.102	52.898	15.5556	-5.1
68	-0.68	-56.8333	-5.226	-5.226	58.774	14.9905	-5
69	-0.69	-48.5	0.65	0.65	64.65	16.4731	-5.1
70	-0.7	-40.1667	6.526	6.526	70.526	16.6008	-5.7
71	-0.71	-31.8333	12.402	12.402	76.402	16.8794	-5.4
72	-0.72	-23.5	18.278	18.278	82.278	16.1117	-5.3
73	-0.73	-15.1667	24.154	24.154	88.154	14.9864	-5.4
74	-0.74	-6.83333	30.03	30.03	94.03	14.4691	-6
75	-0.75	1.5	35.906	35.906	99.906	16.2907	-5.8
76	-0.76	9.83333	41.782	41.782	105.782	16.4571	-6.6
77	-0.77	18.1667	47.658	47.658	111.658	17.8571	-5.6
78	-0.78	26.5	53.534	53.534	117.534	18.0385	-5.2
79	-0.79	34.8333	59.41	59.41	123.41	17.3256	-4.3
80	-0.8	43.1667	65.286	65.286	129.286	17.8853	-4
81	-0.81	51.5	71.162	71.162	135.162	17.8571	-4.8
82	-0.82	59.8333	77.038	77.038	141.038	16.1685	-4.5
83	-0.83	68.1667	82.914	82.914	146.914	15.4584	-4.7
84	-0.84	76.5	88.79	88.79	152.79	15.5702	-5.2
85	-0.85	84.8333	94.666	94.666	158.666	14.2477	-5.2
86	-0.86	93.1667	100.542	100.542	164.542	18.1899	-5.6
87	-0.87	101.5	106.418	106.418	170.418	18.3908	-6
88	-0.88	109.833	112.294	112.294	176.294	20.0561	-5.2
89	-0.89	118.167		118.167	182.167	19.4286	-5.6
90	-0.9	126.5		126.5	190.5	21.5328	-5.9
91	-0.91	134.833		134.833	198.833	20.7332	-2.5
92	-0.92	143.167		143.167	207.167	20.0688	-5.1
93	-0.93	151.5		151.5	215.5	18.2366	-4.3
94	-0.94	159.833		159.833	223.833	18.0022	-5.6
95	-0.95	168.167		168.167	232.167	16.3311	-6.8
96	-0.96	176.5		176.5	240.5	20.7972	-7.5
97	-0.97	184.833		184.833	248.833	28.2007	-3.6
98	-0.98	193.167		193.167	257.167	23.6667	-3.3
99	-0.99	201.5		201.5	265.5	19.9063	-3.6
100	-1	209.833		209.833	273.833	18.0556	-3.6
					64
118	-1.18	359.833		359.833	423.833	25.523	-3.1
119	-1.19	368.167		368.167	432.167		-2.6
120	-1.2	376.5		376.5	440.5	23.348	-2.4
121	-1.21	384.833		384.833	448.833	23.3533	-1.8
122	-1.22	393.167		393.167	457.167	23.3333	-2.8
123	-1.23	401.5		401.5	465.5	22.973	-3.2
124	-1.24	409.833		409.833	473.833	23.5577	-3
125	-1.25	418.167		418.167	482.167	22.963	-3.2
126	-1.26	426.5		426.5	490.5	29.7101	-3.5
127	-1.27	434.833		434.833	498.833	22.7273	-3.9
128	-1.28	443.167		443.167	507.167	25.7752	-3.7
129	-1.29	451.5		451.5	515.5	23	-3.3
130	-1.3	459.833		459.833	523.833	29.1022	-3.7
131	-1.31	468.167		468.167	532.167	25.9124	-3.8
132	-1.32	476.5		476.5	540.5	23.9057	-4
133	-1.33	484.833		484.833	548.833	24.2902	-3.9
134	-1.34	493.167		493.167	557.167	19.0476	-3.6
135	-1.35	501.5		501.5	565.5	20.8955	-3.7
136	-1.36	509.833		509.833	573.833	25.788	-3.7
137	-1.37	518.167		518.167	582.167	24.6537	-3.9
138	-1.38	526.5		526.5	590.5	21.5017	-4.4
139	-1.39	534.833		534.833	598.833	22.0708	-3.8
140	-1.4	543.167		543.167	607.167	24.5763	-3.4
141	-1.41	551.5		551.5	615.5	19.8454	-3.2
142	-1.42	559.833		559.833	623.833	20.7407	-3.3
143	-1.43	568.167		568.167	632.167	22.4444	-3.5
144	-1.44	576.5		576.5	640.5	24.7588	-3.6
145	-1.45	584.833		584.833	648.833	21.3974	-3.8
146	-1.46	593.167		593.167	657.167	23.3438	-3.8
147	-1.47	601.5		601.5	665.5	27.4194	-3.6
148	-1.48	609.833		609.833	673.833	26.4706	-3.2
149	-1.49	618.167		618.167	682.167	25.5952	-4.2
150	-1.5	626.5		626.5	690.5	33.5821	-4.6
151	-1.51	634.833		634.833	698.833	28.5714	-4.9
152	-1.52	643.167		643.167	707.167	44.3709	-4.8
153	-1.53	651.5		651.5	715.5	55.5556	-4.6
154	-1.54	659.833		659.833	723.833	72	-4.9
155	-1.55	668.167		668.167	732.167	73.2558	-5.3
156	-1.56	676.5		676.5	740.5	74.026	-5.1
157	-1.57	684.833		684.833	748.833	66.1765	-4.7
158	-1.58	693.167		693.167	757.167	68.0851	-4.8
159	-1.59	701.5		701.5	765.5	67.2269	-4.5
160	-1.6	709.833		709.833	773.833	62.8319	-5
161	-1.61	718.167		718.167	782.167	66.25	-4.8
162	-1.62	726.5		726.5	790.5	72.5	-4.7
163	-1.63	734.833		734.833	798.833	77.7778	-4.9
164	-1.64	743.167		743.167	807.167	61.9469	-4.8
165	-1.65	751.5		751.5	815.5	51.1628	-5.3
166	-1.66	759.833		759.833	823.833	50.4425	-5.3
167	-1.67	768.167		768.167	832.167	54.7945	-5.4
168	-1.68	776.5		776.5	840.5	62	-5.5
169	-1.69	784.833		784.833	848.833	75.8242	-5.1
170	-1.7	793.167		793.167	857.167	79.1667	-5.7
171	-1.71	801.5		801.5	865.5	82.9268	-5.7
172	-1.72	809.833		809.833	873.833	72.973	-5.8
173	-1.73	818.167		818.167	882.167	77.931	-5.9
174	-1.74	826.5		826.5	890.5	75.5435	-5.5
175	-1.75	834.833		834.833	898.833	65.1685	-5.8
176	-1.76	843.167		843.167	907.167	63.8554	-5.8
177	-1.77	851.5		851.5	915.5	67.658	-5.7
178	-1.78	859.833		859.833	923.833	64.6154	-5.6
179	-1.79	868.167		868.167	932.167	65.3846	-4.6
180	-1.8	876.5		876.5	940.5	63.8889	-5.2
181	-1.81	884.833		884.833	948.833	68.5714	-5.2
182	-1.82	893.167		893.167	957.167	76.2557	-5.1
183	-1.83	901.5		901.5	965.5	71.7391	-5.3
184	-1.84	909.833		909.833	973.833	65.8824	-4.6
185	-1.85	918.167		918.167	982.167	42.8105	-4.9
186	-1.86	926.5		926.5	990.5	54.3568	-5
187	-1.87	934.833		934.833	998.833	53.3808	-5
188	-1.88	943.167		943.167	1007.17	49.6124	-5.1
189	-1.89	951.5		951.5	1015.5	52.1739	-4.4
190	-1.9	959.833		959.833	1023.83	66.9323	-4.7
191	-1.91	968.167		968.167	1032.17	72.973	-4.8
192	-1.92	976.5		976.5	1040.5	65.9864	-4.8
193	-1.93	984.833		984.833	1048.83	71.1538	-4.8
194	-1.94	993.167		993.167	1057.17	70.1571	-3.6
195	-1.95	1001.5		1001.5	1065.5	80	-3.1
196	-1.96	1009.83		1009.83	1073.83	78.75	-2.5
197	-1.97	1018.17		1018.17	1082.17	63.2768	-1.9
198	-1.98	1026.5		1026.5	1090.5	58.75	-1.3
199	-1.99	1034.83		1034.83	1098.83	52.9412	-5.7
200	-2	1043.17		1043.17	1107.17	55.5556	-6.6
					64
213	-2.13	1151.5		1151.5	1215.5	38.0855	-7.2
214	-2.14	1159.83		1159.83	1223.83	36.9338	-7.2
215	-2.15	1168.17		1168.17	1232.17	44.5344	-7
216	-2.16	1176.5		1176.5	1240.5	48.3483	-6.4
217	-2.17	1184.83		1184.83	1248.83	45.4545	-6.6
218	-2.18	1193.17		1193.17	1257.17	48.0969	-6.6
219	-2.19	1201.5		1201.5	1265.5	51.2755	-6.1
220	-2.2	1209.83		1209.83	1273.83	48.2673	-5.7
221	-2.21	1218.17		1218.17	1282.17	49.8915	-5.8
222	-2.22	1226.5		1226.5	1290.5	53.7223	-6.7
223	-2.23	1234.83		1234.83	1298.83	43.4426	-7.2
224	-2.24	1243.17		1243.17	1307.17	36.7751	-7.1
225	-2.25	1251.5		1251.5	1315.5	45.1667	-6.9
226	-2.26	1259.83		1259.83	1323.83	38.9791	-6.5
227	-2.27	1268.17		1268.17	1332.17	34.0062	-6.9
228	-2.28	1276.5		1276.5	1340.5	33.3793	-6.9
229	-2.29	1284.83		1284.83	1348.83	29.1074	-6.9
230	-2.3	1293.17		1293.17	1357.17	35.6841	-6.6
231	-2.31	1301.5		1301.5	1365.5	34.2736	-6.1
232	-2.32	1309.83		1309.83	1373.83	30.7002	-6.3
233	-2.33	1318.17		1318.17	1382.17	36.8571	-6.6
234	-2.34	1326.5		1326.5	1390.5	29.6034	-6.9
235	-2.35	1334.83		1334.83	1398.83	29.0798	-7.2
236	-2.36	1343.17		1343.17	1407.17	30.2867	-6.5
237	-2.37	1351.5		1351.5	1415.5	28.2318	-7
238	-2.38	1359.83		1359.83	1423.83	30.2682	-6.8
239	-2.39	1368.17		1368.17	1432.17	34.2373	-7.1
240	-2.4	1376.5		1376.5	1440.5	34.4348	-7.2
241	-2.41	1384.83		1384.83	1448.83	29.386	-6.2
242	-2.42	1393.17		1393.17	1457.17	29.872	-6.4
243	-2.43	1401.5		1401.5	1465.5	31.348	-6.9
244	-2.44	1409.83		1409.83	1473.83	28.4848	-6.2
245	-2.45	1418.17		1418.17	1482.17	29.588	-6.5
246	-2.46	1426.5		1426.5	1490.5	31.6667	-5.9
247	-2.47	1434.83		1434.83	1498.83	27.7916	-6.2
248	-2.48	1443.17		1443.17	1507.17		-6
249	-2.49	1451.5		1451.5	1515.5	28.0612	-6.2
250	-2.5	1459.83		1459.83	1523.83	22.449	-6.2
251	-2.51	1468.17		1468.17	1532.17	20.7632	-5.5
252	-2.52	1476.5		1476.5	1540.5	22.8	-6
253	-2.53	1484.83		1484.83	1548.83	22.2494	-5.7
254	-2.54	1493.17		1493.17	1557.17	28.8235	-5.7
255	-2.55	1501.5		1501.5	1565.5	26.8874	-5.7
256	-2.56	1509.83		1509.83	1573.83	22.2535	-4.9
257	-2.57	1518.17		1518.17	1582.17	22.4522	-5.1
258	-2.58	1526.5		1526.5	1590.5	22.3108	-5.3
259	-2.59	1534.83		1534.83	1598.83	20.9909	-5.4
260	-2.6	1543.17		1543.17	1607.17	21.4555	-5.4
261	-2.61	1551.5		1551.5	1615.5	23.3735	-4.9
262	-2.62	1559.83		1559.83	1623.83	23.7826	-4.9
263	-2.63	1568.17		1568.17	1632.17	26.8116	-5.1
264	-2.64	1576.5		1576.5	1640.5	25.0435	-5
265	-2.65	1584.83		1584.83	1648.83	30.1619	-5.4
266	-2.66	1593.17		1593.17	1657.17	24.3319	-4.2
267	-2.67	1601.5		1601.5	1665.5	27.7174	-5
268	-2.68	1609.83		1609.83	1673.83	25.8394	-5.1
269	-2.69	1618.17		1618.17	1682.17	26.1176	-5.1
270	-2.7	1626.5		1626.5	1690.5	23.4463	-5.2
271	-2.71	1634.83		1634.83	1698.83	20.757	-4.7
272	-2.72	1643.17		1643.17	1707.17	19.2849	-4.5
273	-2.73	1651.5		1651.5	1715.5	20.9174	-4.4
274	-2.74	1659.83		1659.83	1723.83	19.3248	-4.1
275	-2.75	1668.17		1668.17	1732.17	18.2911	-3.7
276	-2.76	1676.5		1676.5	1740.5	17.827	-3.6
277	-2.77	1684.83		1684.83	1748.83	19.7133	-3.9
278	-2.78	1693.17		1693.17	1757.17	19.7241	-4
279	-2.79	1701.5		1701.5	1765.5	15.8174	-4.4
280	-2.8	1709.83		1709.83	1773.83	17.5182	-5
281	-2.81	1718.17		1718.17	1782.17	15.855	-4.3
282	-2.82	1726.5		1726.5	1790.5	16.9399	-4.6
283	-2.83	1734.83		1734.83	1798.83	16.0085	-3.3
284	-2.84	1743.17		1743.17	1807.17	18.238	-3.5
285	-2.85	1751.5		1751.5	1815.5	14.9333	-1.8
286	-2.86	1759.83		1759.83	1823.83	16.2319	8.4
287	-2.87	1768.17		1768.17	1832.17	16.1538	12
288	-2.88	1776.5		1776.5	1840.5	18.6289	5.7
289	-2.89	1784.83		1784.83	1848.83	16.5101	-0.7
290	-2.9	1793.17		1793.17	1857.17	16.3978	1.3
291	-2.91	1801.5		1801.5	1865.5	15.6533	-1.4
292	-2.92	1809.83		1809.83	1873.83	18.5185	-3.1
293	-2.93	1818.17		1818.17	1882.17	25.046	-3.7
294	-2.94	1826.5		1826.5	1890.5	17.0109	-3.8
295	-2.95	1834.83		1834.83	1898.83	18.2482	-3.6
296	-2.96	1843.17		1843.17	1907.17	17.4757	-3.4
297	-2.97	1851.5		1851.5	1915.5	16.5345	-3.8
298	-2.98	1859.83		1859.83	1923.83	16.4219	-4.2
299	-2.99	1868.17		1868.17	1932.17	15	-4.2
300	-3	1876.5		1876.5	1940.5	16.4905	-3.7
					64
302	-3.02	1893.17		1893.17	1957.17	15.5985	-3
303	-3.03	1901.5		1901.5	1965.5	15.5361	-3.1
304	-3.04	1909.83		1909.83	1973.83	16.4875	-1.3
305	-3.05	1918.17		1918.17	1982.17	16.4027	-2.1
306	-3.06	1926.5		1926.5	1990.5	16.5372	-2.6
307	-3.07	1934.83		1934.83	1998.83	16.7355	-4.5
308	-3.08	1943.17		1943.17	2007.17	16.227	-4.2
309	-3.09	1951.5		1951.5	2015.5	16.2492	-4.8
310	-3.1	1959.83		1959.83	2023.83	17.2336	-4.6
311	-3.11	1968.17		1968.17	2032.17	17.4279	-4.6
312	-3.12	1976.5		1976.5	2040.5	18.0383	-4.4
313	-3.13	1984.83		1984.83	2048.83	18.756	-4.6
314	-3.14	1993.17		1993.17	2057.17	18.1159	-4.4
315	-3.15	2001.5		2001.5	2065.5	18.1269	-2.9
316	-3.16	2009.83		2009.83	2073.83	18.5215	-4.6
317	-3.17	2018.17		2018.17	2082.17	18.091	-4.7
318	-3.18	2026.5		2026.5	2090.5	20.6755	-4.5
319	-3.19	2034.83		2034.83	2098.83	18.6441	-4.5
320	-3.2	2043.17		2043.17	2107.17	18.8963	-4.2
321	-3.21	2051.5		2051.5	2115.5	18.5759	-3.5
322	-3.22	2059.83		2059.83	2123.83	23.3223	-3.7
323	-3.23	2068.17		2068.17	2132.17	21.4508	-4.3
324	-3.24	2076.5		2076.5	2140.5	22.2474	-4.7
325	-3.25	2084.83		2084.83	2148.83	21.2162	-4.2
326	-3.26	2093.17		2093.17	2157.17	24.1192	-4.4
327	-3.27	2101.5		2101.5	2165.5	26.7105	-3
328	-3.28	2109.83		2109.83	2173.83	25.6709	-4.3
329	-3.29	2118.17		2118.17	2182.17	26.4746	-4.4
330	-3.3	2126.5		2126.5	2190.5	26.4775	-4.1
331	-3.31	2134.83		2134.83	2198.83	23.4005	-4.9
332	-3.32	2143.17		2143.17	2207.17	26.4368	-4.5
333	-3.33	2151.5		2151.5	2215.5	19.5402	-4.9
334	-3.34	2159.83		2159.83	2223.83	21.6893	-4.9
335	-3.35	2168.17		2168.17	2232.17	20.2989	-4.6
336	-3.36	2176.5		2176.5	2240.5	14.7554	4.5
337	-3.37	2184.83		2184.83	2248.83	16.6879	-4.4
338	-3.38	2193.17		2193.17	2257.17	14.1003	-4.6
339	-3.39	2201.5		2201.5	2265.5	18.171	-4.6
340	-3.4	2209.83		2209.83	2273.83	18.7166	-4.8
341	-3.41	2218.17		2218.17	2282.17	17.735	-6
342	-3.42	2226.5		2226.5	2290.5	17.6285	-4.1
343	-3.43	2234.83		2234.83	2298.83	17.8794	-4.1
344	-3.44	2243.17		2243.17	2307.17	16.5006	-4.2
345	-3.45	2251.5		2251.5	2315.5	20.6365	-4.4
346	-3.46	2259.83		2259.83	2323.83	20.331	-4.7
347	-3.47	2268.17		2268.17	2332.17	16	-3.7
348	-3.48	2276.5		2276.5	2340.5	14.8988	-4.2
349	-3.49	2284.83		2284.83	2348.83	16.6225	-4
350	-3.5	2293.17		2293.17	2357.17	18.5825	-4.3
351	-3.51	2301.5		2301.5	2365.5	18.0029	-4.3
352	-3.52	2309.83		2309.83	2373.83	14.023	-3.2
353	-3.53	2318.17		2318.17	2382.17	12.8187	-3.1
354	-3.54	2326.5		2326.5	2390.5	11.1182	-3.1
355	-3.55	2334.83		2334.83	2398.83	11.3322	-3.3
356	-3.56	2343.17		2343.17	2407.17	13.548	-4.3
357	-3.57	2351.5		2351.5	2415.5	11.3955	-3.9
358	-3.58	2359.83		2359.83	2423.83	11.165	-2.8
359	-3.59	2368.17		2368.17	2432.17	10.9484	-3.1
360	-3.6	2376.5		2376.5	2440.5	12.3134	-3.3
361	-3.61	2384.83		2384.83	2448.83	12.5586	1.4
362	-3.62	2393.17		2393.17	2457.17	13.884	16.2
363	-3.63	2401.5		2401.5	2465.5	13.3504	-3.5
364	-3.64	2409.83		2409.83	2473.83	15.8358	-3.2
365	-3.65	2418.17		2418.17	2482.17	15.1028	-3.8
366	-3.66	2426.5		2426.5	2490.5	13.8342	-4
367	-3.67	2434.83		2434.83	2498.83	14.8746	-2.9
368	-3.68	2443.17		2443.17	2507.17	13.61	-3.3
369	-3.69	2451.5		2451.5	2515.5	15.3846	-2
370	-3.7	2459.83		2459.83	2523.83	17.4036	-4.8
371	-3.71	2468.17		2468.17	2532.17	17.038	-4.8
372	-3.72	2476.5		2476.5	2540.5	19.0732	-0.2
373	-3.73	2484.83		2484.83	2548.83	18.1955	-3.5
374	-3.74	2493.17		2493.17	2557.17	15.9897	-4
375	-3.75	2501.5		2501.5	2565.5	15.2086	-4.5
376	-3.76	2509.83		2509.83	2573.83	13.7271	-5.1
377	-3.77	2518.17		2518.17	2582.17	14.4121	-3.9
378	-3.78	2526.5		2526.5	2590.5	13.8078	-4.5
379	-3.79	2534.83		2534.83	2598.83	13.3232	-4.6
380	-3.8	2543.17		2543.17	2607.17	12.6685	-3.2
381	-3.81	2551.5		2551.5	2615.5	13.9969	-4.2
382	-3.82	2559.83		2559.83	2623.83	12.3862	-3.7
383	-3.83	2568.17		2568.17	2632.17	11.5578	-2.9
384	-3.84	2576.5		2576.5	2640.5	11.0212	-3.9
385	-3.85	2584.83		2584.83	2648.83	11.9012	-3.9
386	-3.86	2593.17		2593.17	2657.17	11.4531	-3.9
387	-3.87	2601.5		2601.5	2665.5	11.2276	-2.8
388	-3.88	2609.83		2609.83	2673.83	12.6406	1.4
389	-3.89	2618.17		2618.17	2682.17	11.2207	-3.4
390	-3.9	2626.5		2626.5	2690.5	14.0879	-2.5
391	-3.91	2634.83		2634.83	2698.83	14.2016	-2.3
392	-3.92	2643.17		2643.17	2707.17	12.6499	-0.4
393	-3.93	2651.5		2651.5	2715.5	12.7458	-0.5
394	-3.94	2659.83		2659.83	2723.83	12.9218	18.6
395	-3.95	2668.17		2668.17	2732.17	13.6087	-0.4
396	-3.96	2676.5		2676.5	2740.5	13.5034	-4
397	-3.97	2684.83		2684.83	2748.83	12.8571	-4.3
398	-3.98	2693.17		2693.17	2757.17	12.3476	-3.4
399	-3.99	2701.5		2701.5	2765.5	12.1134	-3.4
400	-4	2709.83		2709.83	2773.83	12.22	-3.8
					64
403	-4.03	2734.83		2734.83	2798.83	13.0115	-3.7
404	-4.04	2743.17		2743.17	2807.17	12.8514	-3.5
405	-4.05	2751.5		2751.5	2815.5	12.7501	-4.3
406	-4.06	2759.83		2759.83	2823.83	12.5523	-4.6
407	-4.07	2768.17		2768.17	2832.17	13.0939	-3.5
408	-4.08	2776.5		2776.5	2840.5	12.6183	-4.1
409	-4.09	2784.83		2784.83	2848.83	12.7557	-4.7
410	-4.1	2793.17		2793.17	2857.17	12.6768	-4.4
411	-4.11	2801.5		2801.5	2865.5	12.322	-5
412	-4.12	2809.83		2809.83	2873.83	12.1088	-0.3
413	-4.13	2818.17		2818.17	2882.17	11.1911	-4.1
414	-4.14	2826.5		2826.5	2890.5	10.6908	-3.5
415	-4.15	2834.83		2834.83	2898.83	9.67118	-3.6
416	-4.16	2843.17		2843.17	2907.17	9.98542	-4
417	-4.17	2851.5		2851.5	2915.5	10.1357	-4.5
418	-4.18	2859.83		2859.83	2923.83	8.3499	-3.7
419	-4.19	2868.17		2868.17	2932.17	8.26751	0.1
420	-4.2	2876.5		2876.5	2940.5	9.76354	-0.1
421	-4.21	2884.83		2884.83	2948.83	9.50533	0.7
422	-4.22	2893.17		2893.17	2957.17	10.5078	-1.3
423	-4.23	2901.5		2901.5	2965.5	10.3426	-1.1
424	-4.24	2909.83		2909.83	2973.83	10.7175	1.2
425	-4.25	2918.17		2918.17	2982.17	11.3087	-2.3
426	-4.26	2926.5		2926.5	2990.5	10.9119	-1.7
427	-4.27	2934.83		2934.83	2998.83	10.7923	-2.1
428	-4.28	2943.17		2943.17	3007.17	10.1195	-0.9
429	-4.29	2951.5		2951.5	3015.5	10.5295	0
430	-4.3	2959.83		2959.83	3023.83	11.1655	-1.8
431	-4.31	2968.17		2968.17	3032.17	10.9974	-1.3
432	-4.32	2976.5		2976.5	3040.5	10.5719	-2.8
433	-4.33	2984.83		2984.83	3048.83	10.9536	-1.4
434	-4.34	2993.17		2993.17	3057.17	10.8831	-0.5
435	-4.35	3001.5		3001.5	3065.5	11.2817	-1.4
436	-4.36	3009.83		3009.83	3073.83	10.8166	-1.3
437	-4.37	3018.17		3018.17	3082.17	10.8579	-1.6
438	-4.38	3026.5		3026.5	3090.5	10.9543	-1.4
439	-4.39	3034.83		3034.83	3098.83	10.5686	-1.1
440	-4.4	3043.17		3043.17	3107.17	10.8926	-0.8
441	-4.41	3051.5		3051.5	3115.5	11.0078	-1.7
442	-4.42	3059.83		3059.83	3123.83	10.9948	-1
443	-4.43	3068.17		3068.17	3132.17	11.3843	-0.9
444	-4.44	3076.5		3076.5	3140.5	10.6897	0.2
445	-4.45	3084.83		3084.83	3148.83	11.3946	-0.8
446	-4.46	3093.17		3093.17	3157.17	10.9848	-2.5
447	-4.47	3101.5		3101.5	3165.5	11.1032	-2.8
448	-4.48	3109.83		3109.83	3173.83	11.531	-1.9
449	-4.49	3118.17		3118.17	3182.17	10.905	-0.5
450	-4.5	3126.5		3126.5	3190.5	10.408	-0.7
451	-4.51	3134.83		3134.83	3198.83	10.4942	-1.6
452	-4.52	3143.17		3143.17	3207.17	10.7527	-2.2
453	-4.53	3151.5		3151.5	3215.5	10.0562	-2.4
454	-4.54	3159.83		3159.83	3223.83	9.65361	-1.6
455	-4.55	3168.17		3168.17	3232.17	10.1743	-2.2
456	-4.56	3176.5		3176.5	3240.5	10.4861	-1.5
457	-4.57	3184.83		3184.83	3248.83	9.63391	-1.8
458	-4.58	3193.17		3193.17	3257.17	10.4732	-2.5
459	-4.59	3201.5		3201.5	3265.5	9.07877	-2.2
460	-4.6	3209.83		3209.83	3273.83	10.2713	-1.6
461	-4.61	3218.17		3218.17	3282.17	10.4571	-2.3
462	-4.62	3226.5		3226.5	3290.5	11.6477	-2.3
463	-4.63	3234.83		3234.83	3298.83	11.9923	-2.5
464	-4.64	3243.17		3243.17	3307.17	11.7782	-1.6
465	-4.65	3251.5		3251.5	3315.5	11.5802	-2.5
466	-4.66	3259.83		3259.83	3323.83	11.3043	-1.2
467	-4.67	3268.17		3268.17	3332.17	10.9948	-0.9
468	-4.68	3276.5		3276.5	3340.5	10.0829	-1.8
469	-4.69	3284.83		3284.83	3348.83	10.8946	-1.7
470	-4.7	3293.17		3293.17	3357.17	10.8401	-1.6
471	-4.71	3301.5		3301.5	3365.5	10.3483	-2.2
472	-4.72	3309.83		3309.83	3373.83	10.6902	-1.8
473	-4.73	3318.17		3318.17	3382.17	10.5645	-1.7
474	-4.74	3326.5		3326.5	3390.5	10.1207	-0.9
475	-4.75	3334.83		3334.83	3398.83	11.516	-0.9
476	-4.76	3343.17		3343.17	3407.17	7.80042	-0.7
477	-4.77	3351.5		3351.5	3415.5	10.2217	-0.4
478	-4.78	3359.83		3359.83	3423.83	10.0612	-0.4
479	-4.79	3368.17		3368.17	3432.17	10.5033	-1.7
480	-4.8	3376.5		3376.5	3440.5	9.92958	-2.7
481	-4.81	3384.83		3384.83	3448.83	9.34112	-0.3
482	-4.82	3393.17		3393.17	3457.17	9.44363	0.2
483	-4.83	3401.5		3401.5	3465.5	9.59843		39
484	-4.84	3409.83		3409.83	3473.83	9.01899	-0.9
485	-4.85	3418.17		3418.17	3482.17	9.51111	-1.8
486	-4.86	3426.5		3426.5	3490.5	10.4839	-1.4
487	-4.87	3434.83		3434.83	3498.83	9.57194	-2.4
488	-4.88	3443.17		3443.17	3507.17	9.80926	-3.3
489	-4.89	3451.5		3451.5	3515.5	9.90923	-0.8
490	-4.9	3459.83		3459.83	3523.83	9.08153	-1
491	-4.91	3468.17		3468.17	3532.17	8.17734	-3.1
492	-4.92	3476.5		3476.5	3540.5	8.60585	-4.3
493	-4.93	3484.83		3484.83	3548.83	9.56679	-3.1
494	-4.94	3493.17		3493.17	3557.17	8.99202	-2.8
495	-4.95	3501.5		3501.5	3565.5	9.93789	-0.8
496	-4.96	3509.83		3509.83	3573.83	10	-1.7
497	-4.97	3518.17		3518.17	3582.17	10.1382	-1.8
498	-4.98	3526.5		3526.5	3590.5	8.84244	-1.1
499	-4.99	3534.83		3534.83	3598.83	9.70927	-0.4
500	-5	3543.17		3543.17	3607.17	5.95862	-0.8

## Sheet: Rosier Creek
Depth in core (cm)	meters BSL	Age bottom ybp 1950	Age top ybp 1950	Age composite ybp 1950	Age Ybp 2014	TOM	MagSusc (SI Units)
38	-0.38	-368.571	-64.015	-64.015	-0.015		-1.6				374	3.93684
39	-0.39	-361.429	-60.078	-60.078	3.922	23.6702	-1.7		Slope
40	-0.4	-354.286	-56.141	-56.141	7.859	19.3435	-4.5		y=-0.0014x-0.896
41	-0.41	-347.143	-52.204	-52.204	11.796	21.875	-5.2		x=(y+0.896)/(-0.0014)					399.286
42	-0.42	-340	-48.267	-48.267	15.733	24.4589	-5.7
43	-0.43	-332.857	-44.33	-44.33	19.67	23.3407	-4.9
44	-0.44	-325.714	-40.393	-40.393	23.607	18.6299	-4.4
45	-0.45	-318.571	-36.456	-36.456	27.544	15.8929	-5
46	-0.46	-311.429	-32.519	-32.519	31.481	16.6181	-4.8
47	-0.47	-304.286	-28.582	-28.582	35.418	17.8125	-5.5
48	-0.48	-297.143	-24.645	-24.645	39.355	14.4025	-3.8
49	-0.49	-290	-20.708	-20.708	43.292	15.2582	-5.3							-1.455	304
50	-0.5	-282.857	-16.771	-16.771	47.229	15.9549	-5.1
51	-0.51	-275.714	-12.834	-12.834	51.166	17.3636	-4.4
52	-0.52	-268.571	-8.897	-8.897	55.103	16.5019	-4.2
53	-0.53	-261.429	-4.96	-4.96	59.04	18.4066	-5.6
54	-0.54	-254.286	-1.023	-1.023	62.977	13.3428	-1.6
55	-0.55	-247.143	2.914	2.914	66.914	15.6831			5.6
56	-0.56	-240	6.851	6.851	70.851	15.9747			3.7
57	-0.57	-232.857	10.788	10.788	74.788	17.8094	-3
58	-0.58	-225.714	14.725	14.725	78.725	16.6667	-5.6
59	-0.59	-218.571	18.662	18.662	82.662	19.0476	-6.1
60	-0.6	-211.429	22.599	22.599	86.599	15.2933	-3.9
61	-0.61	-204.286	26.536	26.536	90.536	15.0315	-3.2
62	-0.62	-197.143	30.473	30.473	94.473	13.6414	-3
63	-0.63	-190	34.41	34.41	98.41	15.1144	-2.8
64	-0.64	-182.857	38.347	38.347	102.347	15.5731	-4.1
65	-0.65	-175.714	42.284	42.284	106.284	16.9123	-4.2
66	-0.66	-168.571	46.221	46.221	110.221	17.4895	-5.5
67	-0.67	-161.429	50.158	50.158	114.158	19.2547	-4.9
68	-0.68	-154.286	54.095	54.095	118.095	17.5382	-3.8
69	-0.69	-147.143	58.032	58.032	122.032	15.5285	-3.3
70	-0.7	-140	61.969	61.969	125.969		-4.6
71	-0.71	-132.857	65.906	65.906	129.906	15.6783	-3.4
72	-0.72	-125.714	69.843	69.843	133.843	16.3571	-5.2
73	-0.73	-118.571	73.78	73.78	137.78	17.8571	-5.1
74	-0.74	-111.429	77.717	77.717	141.717	13.8627	-3.8
75	-0.75	-104.286	81.654	81.654	145.654	13.5363	-3.6
76	-0.76	-97.1429	85.591	85.591	149.591	17.7584	-1.7
77	-0.77	-90	89.528	89.528	153.528	18.6992	-5
78	-0.78	-82.8571	93.465	93.465	157.465	20.064	-6
79	-0.79	-75.7143	97.402	97.402	161.402	16.5217	-5.8
80	-0.8	-68.5714	101.339	101.339	165.339	19.3431	-6.4
81	-0.81	-61.4286	105.276	105.276	169.276	19.3392	-5.6
82	-0.82	-54.2857	109.213	109.213	173.213	18.0328	-6.3
83	-0.83	-47.1429	113.15	113.15	177.15		-5.4
84	-0.84	-40	117.087	117.087	181.087	14.2857	-2.9
85	-0.85	-32.8571	121.024	121.024	185.024	12.3703	-2.9
86	-0.86	-25.7143	124.961	124.961	188.961	13.5135	-2.2
87	-0.87	-18.5714	128.898	128.898	192.898	14.6893	-3.1
88	-0.88	-11.4286	132.835	132.835	196.835	16.0626	-2.4
89	-0.89	-4.28571	136.772	136.772	200.772	15.062	-2.5
90	-0.9	2.85714	140.709	140.709	204.709	15.1412	-1.6
91	-0.91	10	144.646	144.646	208.646	13.3808	0.3
92	-0.92	17.1429	148.583	148.583	212.583	14.4928	-0.2
93	-0.93	24.2857	152.52	152.52	216.52	13.7691	0.1
94	-0.94	31.4286	156.457	156.457	220.457	11.9626	-1.8
95	-0.95	38.5714	160.394	160.394	224.394	12.828	-1.3
96	-0.96	45.7143	164.331	164.331	228.331	11.79	3
97	-0.97	52.8571	168.268	168.268	232.268	11.1746	8.7
98	-0.98	60	172.205	172.205	236.205	10.1639	5.2
99	-0.99	67.1429	176.142	176.142	240.142	9.49686	0.6
100	-1	74.2857	180.079	180.079	244.079	11.9575
116	-1.16	188.571	243.071	243.071	307.071	12.6872	-1.5
117	-1.17	195.714	247.008	247.008	311.008		-3.7
118	-1.18	202.857	250.945	250.945	314.945	12.8582	-1.3
119	-1.19	210	254.882	254.882	318.882	13.3333	7
120	-1.2	217.143	258.819	258.819	322.819	13.1833	-1.7
121	-1.21	224.286	262.756	262.756	326.756	14.0984	-3.5
122	-1.22	231.429	266.693	266.693	330.693	13.6842	-2.6
123	-1.23	238.571	270.63	270.63	334.63	14.8936	-3.9
124	-1.24	245.714	274.567	274.567	338.567	14.7016	-5.1
125	-1.25	252.857	278.504	278.504	342.504	15.2856	-4.3
126	-1.26	260	282.441	282.441	346.441	16.1491	-4
127	-1.27	267.143	286.378	286.378	350.378	15.4412	-3.8
128	-1.28	274.286	290.315	290.315	354.315	15.5405	-4.3
129	-1.29	281.429	294.252	294.252	358.252	19.8187	-4.6
130	-1.3	288.571	298.189	298.189	362.189	17.8368	-5.1
131	-1.31	295.714	302.126	302.126	366.126	16.9736	-5.3
132	-1.32	302.857	306.063	306.063	370.063	16.7442	-4.7
133	-1.33	310		310	374	20.5537	-5.2
134	-1.34	317.143		317.143	381.143	15.8763	-6.1
135	-1.35	324.286		324.286	388.286	9.47992	-5.8
136	-1.36	331.429		331.429	395.429	10.7264	-4.9
137	-1.37	338.571		338.571	402.571	14.0882	-4
138	-1.38	345.714		345.714	409.714	16.6295	-4.8
139	-1.39	352.857		352.857	416.857	19.888	-5.1
140	-1.4	360		360	424	21.1765	-5.8
141	-1.41	367.143		367.143	431.143	21.2766	-6
142	-1.42	374.286		374.286	438.286	28.1981	-5.6
143	-1.43	381.429		381.429	445.429	22.2477	-5.8
144	-1.44	388.571		388.571	452.571	25.1087	-5.5
145	-1.45	395.714		395.714	459.714	33.4615	-5.5
146	-1.46	402.857		402.857	466.857	27.1429	-6.3
147	-1.47	410		410	474	29.364	-4.4
148	-1.48	417.143		417.143	481.143	31.3056	-5
149	-1.49	424.286		424.286	488.286	27.6693	-4.9
150	-1.5	431.429		431.429	495.429	25.1938	-5.2
151	-1.51	438.571		438.571	502.571	26.1941	-5.6
152	-1.52	445.714		445.714	509.714	25.4524	-5.9
153	-1.53	452.857		452.857	516.857	28.1407	-5.8
154	-1.54	460		460	524	39.9151	-5.5
155	-1.55	467.143		467.143	531.143	44.9871	-5.5
156	-1.56	474.286		474.286	538.286	32.7273	-5.3
157	-1.57	481.429		481.429	545.429	29.601	-5.4
158	-1.58	488.571		488.571	552.571	29.1951	-5.4
159	-1.59	495.714		495.714	559.714	31.5113	-5.4
160	-1.6	502.857		502.857	566.857	33.3863	-5.5
161	-1.61	510		510	574	32.4363	-5.6
162	-1.62	517.143		517.143	581.143	35	-5
163	-1.63	524.286		524.286	588.286	30.6757	-5.4
164	-1.64	531.429		531.429	595.429	28.7753	-5.3
165	-1.65	538.571		538.571	602.571	32.3099	-5
166	-1.66	545.714		545.714	609.714	26.4209	-5.4
167	-1.67	552.857		552.857	616.857	28.022	-4.9
168	-1.68	560		560	624	29.7101	-5.1
169	-1.69	567.143		567.143	631.143	32.9545	-5.2
170	-1.7	574.286		574.286	638.286	23.8231	-5.2
171	-1.71	581.429		581.429	645.429	26.3021	-5.3
172	-1.72	588.571		588.571	652.571	33.4532	-4.9
173	-1.73	595.714		595.714	659.714	31.5873	-5.5
174	-1.74	602.857		602.857	666.857	34.1426	-5.5
175	-1.75	610		610	674	26.3434	-5.1
176	-1.76	617.143		617.143	681.143	21.4209	-4.6
177	-1.77	624.286		624.286	688.286	20.4433	-4
178	-1.78	631.429		631.429	695.429	22.293	-4.8
179	-1.79	638.571		638.571	702.571	23.5142	-5.2
180	-1.8	645.714		645.714	709.714	26.1814	-5.5
181	-1.81	652.857		652.857	716.857	23.5772	-5.3
182	-1.82	660		660	724	24.758	-4.2
183	-1.83	667.143		667.143	731.143	24.7312	-4.7
184	-1.84	674.286		674.286	738.286	23.852	-4.7
185	-1.85	681.429		681.429	745.429	24.4382	-4.6
186	-1.86	688.571		688.571	752.571	25.5009	-4.5
187	-1.87	695.714		695.714	759.714	24.6689	-3.9
188	-1.88	702.857		702.857	766.857	24.3112	-4.3
189	-1.89	710		710	774	25.897	-4.5
190	-1.9	717.143		717.143	781.143	23.2432	-4.8
191	-1.91	724.286		724.286	788.286	23.1655	-4.7
192	-1.92	731.429		731.429	795.429	23.8953	-3.9
193	-1.93	738.571		738.571	802.571	22.7401	-4.1
194	-1.94	745.714		745.714	809.714	22.7357	-3.9
195	-1.95	752.857		752.857	816.857	21.5596	-3.9
196	-1.96	760		760	824	22.3265	-3.9
197	-1.97	767.143		767.143	831.143	21.5543	-3.8
198	-1.98	774.286		774.286	838.286	23.0159	-4.6
199	-1.99	781.429		781.429	845.429	25.1142	-4.9
200	-2	788.571		788.571	852.571	27.2989	-5
201	-2.01	795.714		795.714	859.714	21.3212	-5.1
202	-2.02	802.857		802.857	866.857	21.4433	-7.3
203	-2.03	810		810	874	20.0881	-6.8
204	-2.04	817.143		817.143	881.143	24.6857	-6.5
205	-2.05	824.286		824.286	888.286	25.8782	-6.4
206	-2.06	831.429		831.429	895.429	24.7312	-7.1
207	-2.07	838.571		838.571	902.571	23.9509	-7.1
208	-2.08	845.714		845.714	909.714	19.1288	-7.3
209	-2.09	852.857		852.857	916.857	26.9179	-7.8
210	-2.1	860		860	924	28.6979	-7.4
211	-2.11	867.143		867.143	931.143	16.8257	-6.5
212	-2.12	874.286		874.286	938.286	23.6142	-6.1
213	-2.13	881.429		881.429	945.429	17.5665	-5.7
214	-2.14	888.571		888.571	952.571	16.4122	-6.2
215	-2.15	895.714		895.714	959.714	17.1308	-5.8
216	-2.16	902.857		902.857	966.857		-5.8
217	-2.17	910		910	974	17.9104	-4.3
218	-2.18	917.143		917.143	981.143	17.5795	-2.2
219	-2.19	924.286		924.286	988.286	17.517	-5.4
220	-2.2	931.429		931.429	995.429	18.1562	-5.5
221	-2.21	938.571		938.571	1002.57	18.6642	-5.8
222	-2.22	945.714		945.714	1009.71	18.1002	-6
223	-2.23	952.857		952.857	1016.86	16.2639	-6
224	-2.24	960		960	1024	17.3975	-6.1
225	-2.25	967.143		967.143	1031.14	16.4459	-6.2
226	-2.26	974.286		974.286	1038.29	19.0625	-5.9
227	-2.27	981.429		981.429	1045.43	20.9205	-5.4
228	-2.28	988.571		988.571	1052.57	20.7039	-5.9
229	-2.29	995.714		995.714	1059.71	20.4734	-5.2
230	-2.3	1002.86		1002.86	1066.86	22.4367	-5.3
231	-2.31	1010		1010	1074	22.2222	-5.3
232	-2.32	1017.14		1017.14	1081.14	22.467	-5.1
233	-2.33	1024.29		1024.29	1088.29	22.9406	-5.6
234	-2.34	1031.43		1031.43	1095.43	23.6805	-5.9
235	-2.35	1038.57		1038.57	1102.57	24.8913	-5.8
236	-2.36	1045.71		1045.71	1109.71	19.8198	-6
237	-2.37	1052.86		1052.86	1116.86	24.2376	-5.7
238	-2.38	1060		1060	1124	29.5987	-5.9
239	-2.39	1067.14		1067.14	1131.14	30.5304	-5.9
240	-2.4	1074.29		1074.29	1138.29	31.5436	-5.5
241	-2.41	1081.43		1081.43	1145.43	29.0566	-5.5
242	-2.42	1088.57		1088.57	1152.57	29.1667	-5.9
243	-2.43	1095.71		1095.71	1159.71	30.6551	-5.9
244	-2.44	1102.86		1102.86	1166.86	22.6679	8
245	-2.45	1110		1110	1174	23.0208	-5.5
246	-2.46	1117.14		1117.14	1181.14	22.4458	-6.2
247	-2.47	1124.29		1124.29	1188.29	17.3716	-5.9
248	-2.48	1131.43		1131.43	1195.43	13.3754	-6.1
249	-2.49	1138.57		1138.57	1202.57	17.3077	-5.9
250	-2.5	1145.71		1145.71	1209.71	18.0964	-4.8
251	-2.51	1152.86		1152.86	1216.86	19.9327	-4.7
252	-2.52	1160		1160	1224	18.1014	0.2
253	-2.53	1167.14		1167.14	1231.14	19.0878	-5.5
254	-2.54	1174.29		1174.29	1238.29	25.4329	-6.5
255	-2.55	1181.43		1181.43	1245.43	21.2278	-6.3
256	-2.56	1188.57		1188.57	1252.57	21.9378	-5.9
257	-2.57	1195.71		1195.71	1259.71	18.6495	-6.2
258	-2.58	1202.86		1202.86	1266.86	17.421	-5.9
259	-2.59	1210		1210	1274	16.2192	-5
260	-2.6	1217.14		1217.14	1281.14	18.4603	-3.5
261	-2.61	1224.29		1224.29	1288.29	20.5902	-2.2
262	-2.62	1231.43		1231.43	1295.43	23.2971	-4.7
263	-2.63	1238.57		1238.57	1302.57	22.2896	-4.9
264	-2.64	1245.71		1245.71	1309.71	22.7715	-5.3
265	-2.65	1252.86		1252.86	1316.86	22.2222	-5.5
266	-2.66	1260		1260	1324	23.301	-5.5
267	-2.67	1267.14		1267.14	1331.14	22.818	-5.9
268	-2.68	1274.29		1274.29	1338.29	18.7888	-5.7
269	-2.69	1281.43		1281.43	1345.43	19.6283	-5.4
270	-2.7	1288.57		1288.57	1352.57	22.8052	-5.2
271	-2.71	1295.71		1295.71	1359.71	18.8136	-4.9
272	-2.72	1302.86		1302.86	1366.86	18.4054	-6
273	-2.73	1310		1310	1374	18.8368	-5.5
274	-2.74	1317.14		1317.14	1381.14	21.4542	-6.2
275	-2.75	1324.29		1324.29	1388.29	19.6653	-5
276	-2.76	1331.43		1331.43	1395.43	21.3819	-5.4
277	-2.77	1338.57		1338.57	1402.57	21.6958	-4.6
278	-2.78	1345.71		1345.71	1409.71	19.6062	-4.9
279	-2.79	1352.86		1352.86	1416.86	20.629	-4.6
280	-2.8	1360		1360	1424	19.6737	-4.6
281	-2.81	1367.14		1367.14	1431.14	19.5011	-4.9
282	-2.82	1374.29		1374.29	1438.29	18.3613	-4.7
283	-2.83	1381.43		1381.43	1445.43	19.4281	-5
284	-2.84	1388.57		1388.57	1452.57	18.9189	-4.9
285	-2.85	1395.71		1395.71	1459.71	18.4534	-5.5
286	-2.86	1402.86		1402.86	1466.86	18.068	-5.3
287	-2.87	1410		1410	1474	16.7215	-5.1
288	-2.88	1417.14		1417.14	1481.14	19.2843	-5.4
289	-2.89	1424.29		1424.29	1488.29	20.2655	-5
290	-2.9	1431.43		1431.43	1495.43	17.5741	-5.7
291	-2.91	1438.57		1438.57	1502.57	19.7943	-5.1
292	-2.92	1445.71		1445.71	1509.71	20	-4.5
293	-2.93	1452.86		1452.86	1516.86	21.7172	-5.1
294	-2.94	1460		1460	1524	31.0078	-5
295	-2.95	1467.14		1467.14	1531.14	27.551	-4.8
296	-2.96	1474.29		1474.29	1538.29	26.7961	8.5
297	-2.97	1481.43		1481.43	1545.43	22.7603	1.1
298	-2.98	1488.57		1488.57	1552.57	19.1489	-3.3
299	-2.99	1495.71		1495.71	1559.71	21.6811	-3.3
300	-3	1502.86		1502.86	1566.86	23.5135	-4.5
301	-3.01	1510		1510	1574	21.059	-4.7
302	-3.02	1517.14		1517.14	1581.14	22.6162	-5
303	-3.03	1524.29		1524.29	1588.29	22.2672	-4.9
304	-3.04	1531.43		1531.43	1595.43	20.7067	-4
305	-3.05	1538.57		1538.57	1602.57	21.704	-2.8
306	-3.06	1545.71		1545.71	1609.71	25.8392	-4.8
307	-3.07	1552.86		1552.86	1616.86	33.1325	-4.1
308	-3.08	1560		1560	1624	25.5495	-5.4
309	-3.09	1567.14		1567.14	1631.14	22.5171	-5.8
310	-3.1	1574.29		1574.29	1638.29	21.8213	-5.6
311	-3.11	1581.43		1581.43	1645.43	22.1083	-5.1
312	-3.12	1588.57		1588.57	1652.57	23.3755	-4.2
313	-3.13	1595.71		1595.71	1659.71	25.8036	-4.5
314	-3.14	1602.86		1602.86	1666.86	27.8132	-4
315	-3.15	1610		1610	1674	27.902	-4.2
316	-3.16	1617.14		1617.14	1681.14	41.0687	-4.2
317	-3.17	1624.29		1624.29	1688.29	49.8382	-3
318	-3.18	1631.43		1631.43	1695.43	55.8499	-4.3
319	-3.19	1638.57		1638.57	1702.57	56.8493	-5
320	-3.2	1645.71		1645.71	1709.71	64.0264	-5.4
321	-3.21	1652.86		1652.86	1716.86	70	-5.9
322	-3.22	1660		1660	1724	61.9048	-5.9
323	-3.23	1667.14		1667.14	1731.14	62.1469	-6.1
324	-3.24	1674.29		1674.29	1738.29	51.8812	-6.2
325	-3.25	1681.43		1681.43	1745.43	61.2121	-6
326	-3.26	1688.57		1688.57	1752.57	49.453	-6.1
327	-3.27	1695.71		1695.71	1759.71	52.1415	-5.8
328	-3.28	1702.86		1702.86	1766.86	54.7753	-6.3
329	-3.29	1710		1710	1774	45.1292	-6.4
330	-3.3	1717.14		1717.14	1781.14	50.9434	-6.5
331	-3.31	1724.29		1724.29	1788.29	48.0519	-6.6
332	-3.32	1731.43		1731.43	1795.43	45.8265	-6.1
333	-3.33	1738.57		1738.57	1802.57	60.6138	-6.5
334	-3.34	1745.71		1745.71	1809.71	62.2222	-6.5
335	-3.35	1752.86		1752.86	1816.86	51.3944	-6.5
336	-3.36	1760		1760	1824	39.1123	-6.3
337	-3.37	1767.14		1767.14	1831.14	29.5252	-5.8
338	-3.38	1774.29		1774.29	1838.29	27.4799	-5.8
339	-3.39	1781.43		1781.43	1845.43	28.8862	-5.7
340	-3.4	1788.57		1788.57	1852.57	25.9027	-5.4
341	-3.41	1795.71		1795.71	1859.71	21.816	-5.6
342	-3.42	1802.86		1802.86	1866.86	18.6906	-4.5
343	-3.43	1810		1810	1874	16.8991	-5.2
344	-3.44	1817.14		1817.14	1881.14	13.9211	-3.9
345	-3.45	1824.29		1824.29	1888.29	14.7791	-4.4
346	-3.46	1831.43		1831.43	1895.43	14.3406	-3.7
347	-3.47	1838.57		1838.57	1902.57	15.5506	-3.3
348	-3.48	1845.71		1845.71	1909.71	13.1408	-2.6
349	-3.49	1852.86		1852.86	1916.86	13.8641	-3
350	-3.5	1860		1860	1924	14.1887	-3.1
351	-3.51	1867.14		1867.14	1931.14	14.6433	-2.7
352	-3.52	1874.29		1874.29	1938.29	14.0726	-4.3
353	-3.53	1881.43		1881.43	1945.43	13.2643	-3.5
354	-3.54	1888.57		1888.57	1952.57	17.5	-2.9
355	-3.55	1895.71		1895.71	1959.71	14.6592	-4.6
356	-3.56	1902.86		1902.86	1966.86	13.7116	-4.2
357	-3.57	1910		1910	1974	12.7033	-3.4
358	-3.58	1917.14		1917.14	1981.14	16.2669	-3.9
359	-3.59	1924.29		1924.29	1988.29	10.3994	-2.6
360	-3.6	1931.43		1931.43	1995.43	11.7931	-2.1
361	-3.61	1938.57		1938.57	2002.57	10.9415	-3.2
362	-3.62	1945.71		1945.71	2009.71	11.0533	-1.9
363	-3.63	1952.86		1952.86	2016.86	11.7465	-2.4
364	-3.64	1960		1960	2024	14.6935	-2.4
365	-3.65	1967.14		1967.14	2031.14	12.7197	-2.6
366	-3.66	1974.29		1974.29	2038.29	12.1852	-2.9
367	-3.67	1981.43		1981.43	2045.43	9.15229	2.6
368	-3.68	1988.57		1988.57	2052.57	13.6134	-1.7
369	-3.69	1995.71		1995.71	2059.71	11.8399	26.2
370	-3.7	2002.86		2002.86	2066.86	11.0384	26.8
371	-3.71	2010		2010	2074	11.1816	10.5
372	-3.72	2017.14		2017.14	2081.14	13.7707	21.6
373	-3.73	2024.29		2024.29	2088.29	12.6814	29.3
374	-3.74	2031.43		2031.43	2095.43	11.2762	146.6
375	-3.75	2038.57		2038.57	2102.57	10.5169	4.1
376	-3.76	2045.71		2045.71	2109.71	10.4885	4
377	-3.77	2052.86		2052.86	2116.86	11.5137	8.9
378	-3.78	2060		2060	2124	14.3737	14.2
379	-3.79	2067.14		2067.14	2131.14	11.3144	8.7
380	-3.8	2074.29		2074.29	2138.29	10.9657	8.4
381	-3.81	2081.43		2081.43	2145.43	10.7229	16.7
382	-3.82	2088.57		2088.57	2152.57	9.56669	2.3
383	-3.83	2095.71		2095.71	2159.71	11.0836	7.1
384	-3.84	2102.86		2102.86	2166.86	9.23196	4.1
385	-3.85	2110		2110	2174	9.58013	6.7
386	-3.86	2117.14		2117.14	2181.14	9.41704	4.2
387	-3.87	2124.29		2124.29	2188.29	10.5634	2.6
388	-3.88	2131.43		2131.43	2195.43	10.1998	2.1
389	-3.89	2138.57		2138.57	2202.57	10.3053	2
390	-3.9	2145.71		2145.71	2209.71	13.2834	-0.1
391	-3.91	2152.86		2152.86	2216.86	16.1576	-0.3
392	-3.92	2160		2160	2224	11.3428	5
393	-3.93	2167.14		2167.14	2231.14	10.8877	-0.7
394	-3.94	2174.29		2174.29	2238.29	10.281	-1.1
395	-3.95	2181.43		2181.43	2245.43	10.4182	0.1
396	-3.96	2188.57		2188.57	2252.57	10.3653	-0.2
397	-3.97	2195.71		2195.71	2259.71	10.917	8
398	-3.98	2202.86		2202.86	2266.86	11.1639	-1.2
399	-3.99	2210		2210	2274	10.4291	1
400	-4	2217.14		2217.14	2281.14	10.9967	-2
403	-4.03	2238.57		2238.57	2302.57	13.0603	1.9
404	-4.04	2245.71		2245.71	2309.71	12.5913	-1.2
405	-4.05	2252.86		2252.86	2316.86	12.4174	1.3
406	-4.06	2260		2260	2324	14.501	-1.3
407	-4.07	2267.14		2267.14	2331.14	15.3054	-1.3
408	-4.08	2274.29		2274.29	2338.29	11.3747	-3.5
409	-4.09	2281.43		2281.43	2345.43	15.1616	-3.2
410	-4.1	2288.57		2288.57	2352.57	11.3011	-3.6
411	-4.11	2295.71		2295.71	2359.71	14.0295	-4.9
412	-4.12	2302.86		2302.86	2366.86	11.6993	-4.7
413	-4.13	2310		2310	2374	12.6897	-1.6
414	-4.14	2317.14		2317.14	2381.14	11.9789	-1.8
415	-4.15	2324.29		2324.29	2388.29	12.7152	-3
416	-4.16	2331.43		2331.43	2395.43	10.7104	-2.1
417	-4.17	2338.57		2338.57	2402.57	10.9272	-2
418	-4.18	2345.71		2345.71	2409.71	11.3783	-2.3
419	-4.19	2352.86		2352.86	2416.86	11.467	-1.9
420	-4.2	2360		2360	2424	11.6763	2.2
421	-4.21	2367.14		2367.14	2431.14	11.195	9.1
422	-4.22	2374.29		2374.29	2438.29	11.0349	-2.2
423	-4.23	2381.43		2381.43	2445.43	16.251	-0.8
424	-4.24	2388.57		2388.57	2452.57	10.3426	6.7
425	-4.25	2395.71		2395.71	2459.71	14.4435	15.4
426	-4.26	2402.86		2402.86	2466.86	11.7171	11.9
427	-4.27	2410		2410	2474	10.5839	2.9
428	-4.28	2417.14		2417.14	2481.14	12.2971	5.3
429	-4.29	2424.29		2424.29	2488.29	18.5092	29.9
430	-4.3	2431.43		2431.43	2495.43	14.8175	22.6
431	-4.31	2438.57		2438.57	2502.57	12.9575	72.5
432	-4.32	2445.71		2445.71	2509.71	12.2119	34.9
433	-4.33	2452.86		2452.86	2516.86	11.0359	9.5
434	-4.34	2460		2460	2524	10.9954	-0.5
435	-4.35	2467.14		2467.14	2531.14	12.3127	-1.4
436	-4.36	2474.29		2474.29	2538.29	12.0659	66.8
437	-4.37	2481.43		2481.43	2545.43	11.5772	110.5
438	-4.38	2488.57		2488.57	2552.57	10.7485	-1
439	-4.39	2495.71		2495.71	2559.71	11.2668	1.4
440	-4.4	2502.86		2502.86	2566.86	11.8066	0.8
441	-4.41	2510		2510	2574	11.273	0.9
442	-4.42	2517.14		2517.14	2581.14	11.3484	-1
443	-4.43	2524.29		2524.29	2588.29	10.9573	-2.2
444	-4.44	2531.43		2531.43	2595.43	11.7306	-0.5
445	-4.45	2538.57		2538.57	2602.57	11.2287	-0.1
446	-4.46	2545.71		2545.71	2609.71	12.9893	-0.3
447	-4.47	2552.86		2552.86	2616.86	12.3759	-0.9
448	-4.48	2560		2560	2624	12.9896	1.8
449	-4.49	2567.14		2567.14	2631.14	12.9293	2.1
450	-4.5	2574.29		2574.29	2638.29	13.7157	7.4
451	-4.51	2581.43		2581.43	2645.43	14.3447	21.7
452	-4.52	2588.57		2588.57	2652.57	15.623	2.3
453	-4.53	2595.71		2595.71	2659.71		0.7
454	-4.54	2602.86		2602.86	2666.86	17.2018	-2.5
455	-4.55	2610		2610	2674	14.8235	7.5
456	-4.56	2617.14		2617.14	2681.14	14.752	-3.2
457	-4.57	2624.29		2624.29	2688.29	14.5161	-3.1
458	-4.58	2631.43		2631.43	2695.43	14.5299	-2.8
459	-4.59	2638.57		2638.57	2702.57	12.6412	-3.9
460	-4.6	2645.71		2645.71	2709.71	19.7941	-4.1
461	-4.61	2652.86		2652.86	2716.86	17.8718	-3
462	-4.62	2660		2660	2724	22.6804	-3.3
463	-4.63	2667.14		2667.14	2731.14	16.748	-3.3
464	-4.64	2674.29		2674.29	2738.29	17.8851	-3.7
465	-4.65	2681.43		2681.43	2745.43	20.0335	-3.6
466	-4.66	2688.57		2688.57	2752.57	18.0239	-3.1
467	-4.67	2695.71		2695.71	2759.71	17.434	-3.4
468	-4.68	2702.86		2702.86	2766.86	17.7831	-3.7
469	-4.69	2710		2710	2774	19.3914	-4.8
470	-4.7	2717.14		2717.14	2781.14	18.3764	-5.2
471	-4.71	2724.29		2724.29	2788.29	14.6306	-3.4
472	-4.72	2731.43		2731.43	2795.43	13.8719	-3.8
473	-4.73	2738.57		2738.57	2802.57	13.2497	-3.5
474	-4.74	2745.71		2745.71	2809.71	14.0421	-3.3
475	-4.75	2752.86		2752.86	2816.86	13.6205	-3.5
476	-4.76	2760		2760	2824	13.8358	-3.2
477	-4.77	2767.14		2767.14	2831.14	13.5062	-2.7
478	-4.78	2774.29		2774.29	2838.29	14.591	-3.2
479	-4.79	2781.43		2781.43	2845.43	15.8333	-2.8
480	-4.8	2788.57		2788.57	2852.57	16.2254	-2.8
481	-4.81	2795.71		2795.71	2859.71	17.3205	-2.1
482	-4.82	2802.86		2802.86	2866.86	20.0599	-3.2
483	-4.83	2810		2810	2874	20.2321	-5.5
484	-4.84	2817.14		2817.14	2881.14	18.5752	-3.7
485	-4.85	2824.29		2824.29	2888.29	14.6591	-4.6
486	-4.86	2831.43		2831.43	2895.43	13.8351	-2.8
487	-4.87	2838.57		2838.57	2902.57	33.0132	-2.7
488	-4.88	2845.71		2845.71	2909.71	19.0829	-3.8
489	-4.89	2852.86		2852.86	2916.86	15.2326	-4.3
490	-4.9	2860		2860	2924	15.1571	-2.6
491	-4.91	2867.14		2867.14	2931.14	15.6875	-1.6
492	-4.92	2874.29		2874.29	2938.29	15.8105	-3.6
493	-4.93	2881.43		2881.43	2945.43	16.5372	-3.5
494	-4.94	2888.57		2888.57	2952.57	14.1914	-2.3
495	-4.95	2895.71		2895.71	2959.71	13.1623	-1.9
496	-4.96	2902.86		2902.86	2966.86	11.8785	-2.3
497	-4.97	2910		2910	2974	11.5284	-1
498	-4.98	2917.14		2917.14	2981.14	12.9696	-1.3
499	-4.99	2924.29		2924.29	2988.29	12.6154	-0.1
500	-5	2931.43		2931.43	2995.43	13.0597	-3.5
508	-5.08	2988.57		2988.57	3052.57	14.9679	-3
509	-5.09	2995.71		2995.71	3059.71		-2.4	77.193
510	-5.1	3002.86		3002.86	3066.86	13.5314	-3.1
511	-5.11	3010		3010	3074	10.7192	-2.5
512	-5.12	3017.14		3017.14	3081.14	12.4283	-3.2
513	-5.13	3024.29		3024.29	3088.29	13.1043	-3.5
514	-5.14	3031.43		3031.43	3095.43	11.4754	-2.5
515	-5.15	3038.57		3038.57	3102.57	10.6965	-0.7
516	-5.16	3045.71		3045.71	3109.71	10.3519	-0.4
517	-5.17	3052.86		3052.86	3116.86	11.3636	-0.1
518	-5.18	3060		3060	3124	13.1944	-1.2
519	-5.19	3067.14		3067.14	3131.14	11.7851	-0.5
520	-5.2	3074.29		3074.29	3138.29	12.6357	0.6
521	-5.21	3081.43		3081.43	3145.43	10.5528	1.5
522	-5.22	3088.57		3088.57	3152.57	11.0351	-1
523	-5.23	3095.71		3095.71	3159.71	11.4563	-1.5
524	-5.24	3102.86		3102.86	3166.86	11.7065	-1.5
525	-5.25	3110		3110	3174	12.6365	-1.5
526	-5.26	3117.14		3117.14	3181.14	11.6564	4.2
527	-5.27	3124.29		3124.29	3188.29	12.5264	3
528	-5.28	3131.43		3131.43	3195.43	14.2234	-0.1
529	-5.29	3138.57		3138.57	3202.57	13.4559	4
530	-5.3	3145.71		3145.71	3209.71	13.0131	2.4
531	-5.31	3152.86		3152.86	3216.86	13.1025	-1
532	-5.32	3160		3160	3224	13.0466	-2.9
533	-5.33	3167.14		3167.14	3231.14	13.1402	-2.8
534	-5.34	3174.29		3174.29	3238.29	13.7329	-2.7
535	-5.35	3181.43		3181.43	3245.43	11.3338	-2.3
536	-5.36	3188.57		3188.57	3252.57	11.6858	-1.9
537	-5.37	3195.71		3195.71	3259.71	11.9296	-1.2
538	-5.38	3202.86		3202.86	3266.86	12.8242	-1.8
539	-5.39	3210		3210	3274	12.0837	2.7
540	-5.4	3217.14		3217.14	3281.14	11.4004	-3.2
541	-5.41	3224.29		3224.29	3288.29	12.6782	7.7
542	-5.42	3231.43		3231.43	3295.43	12.8769	-2.9
543	-5.43	3238.57		3238.57	3302.57	12.8917	-2.2
544	-5.44	3245.71		3245.71	3309.71	13.1788	-2.7
545	-5.45	3252.86		3252.86	3316.86	12.8551	-2.3
546	-5.46	3260		3260	3324	11.9835	0.3
547	-5.47	3267.14		3267.14	3331.14	12.559	0.1
548	-5.48	3274.29		3274.29	3338.29	12.786	0.8
549	-5.49	3281.43		3281.43	3345.43	12.1555	22.4
550	-5.5	3288.57		3288.57	3352.57	11.2266	0.5
551	-5.51	3295.71		3295.71	3359.71	11.2892	0.4
552	-5.52	3302.86		3302.86	3366.86	12.7638	0.8
553	-5.53	3310		3310	3374	10.879	0
554	-5.54	3317.14		3317.14	3381.14	10.1839	6.4
555	-5.55	3324.29		3324.29	3388.29	10.4516	0.4
556	-5.56	3331.43		3331.43	3395.43	10.3185	27.8
557	-5.57	3338.57		3338.57	3402.57	10.4075	271.8
558	-5.58	3345.71		3345.71	3409.71	10.4009	94
559	-5.59	3352.86		3352.86	3416.86	10.1585	19.7
560	-5.6	3360		3360	3424	9.97199	18.6
561	-5.61	3367.14		3367.14	3431.14	9.75877	67.7
562	-5.62	3374.29		3374.29	3438.29	9.86526	234
563	-5.63	3381.43		3381.43	3445.43	13.1319	157.7
564	-5.64	3388.57		3388.57	3452.57	14.0768	12.6
565	-5.65	3395.71		3395.71	3459.71	13.3163	55.1
566	-5.66	3402.86		3402.86	3466.86	11.7955	2.4
567	-5.67	3410		3410	3474	12.2302	5.9
568	-5.68	3417.14		3417.14	3481.14	11.8536	-0.1
569	-5.69	3424.29		3424.29	3488.29	10.6983	0.4
570	-5.7	3431.43		3431.43	3495.43	10.4403	1.2
571	-5.71	3438.57		3438.57	3502.57	10.5867	1.3
572	-5.72	3445.71		3445.71	3509.71	11.3916	5.8
573	-5.73	3452.86		3452.86	3516.86	11.4064	20
574	-5.74	3460		3460	3524	12.8251	4.4
575	-5.75	3467.14		3467.14	3531.14	11.642	-1.2
576	-5.76	3474.29		3474.29	3538.29	11.0159	-1.5
577	-5.77	3481.43		3481.43	3545.43	10.7093	2.8
578	-5.78	3488.57		3488.57	3552.57	22.3307	2.1
579	-5.79	3495.71		3495.71	3559.71	11.6461	1.3
580	-5.8	3502.86		3502.86	3566.86	11.1732	2.4
581	-5.81	3510		3510	3574	11.4263	2
582	-5.82	3517.14		3517.14	3581.14	10.8696	2.9
583	-5.83	3524.29		3524.29	3588.29	11.5584	2.6
584	-5.84	3531.43		3531.43	3595.43	12.5164	2.5
585	-5.85	3538.57		3538.57	3602.57	11.8506	8.7
586	-5.86	3545.71		3545.71	3609.71	10.9794	106.1
587	-5.87	3552.86		3552.86	3616.86	13.1579	30.6
588	-5.88	3560		3560	3624	12.9266	5.9
589	-5.89	3567.14		3567.14	3631.14	13.1148	-1.9
590	-5.9	3574.29		3574.29	3638.29	11.0526	-2.4
591	-5.91	3581.43		3581.43	3645.43	11.5365	1.5
592	-5.92	3588.57		3588.57	3652.57	11.9747	5.2
593	-5.93	3595.71		3595.71	3659.71	11.4079	4
594	-5.94	3602.86		3602.86	3666.86	11.7527	2.5
595	-5.95	3610		3610	3674	12.3504	1.4
596	-5.96	3617.14		3617.14	3681.14	10.9302	19.1
597	-5.97	3624.29		3624.29	3688.29	11.7754	0.5
598	-5.98	3631.43		3631.43	3695.43	11.3829	0.2
599	-5.99	3638.57		3638.57	3702.57	10.4776	0.9
600	-6	3645.71		3645.71	3709.71	11.7174	2
630	-6.3	3860		3860	3924	11.056	11.8
631	-6.31	3867.14		3867.14	3931.14	12.7072	9.5
632	-6.32	3874.29		3874.29	3938.29	9.50752	0.2
633	-6.33	3881.43		3881.43	3945.43	11.4497	8
634	-6.34	3888.57		3888.57	3952.57	10.664	2.5
635	-6.35	3895.71		3895.71	3959.71	10.644	-0.3
636	-6.36	3902.86		3902.86	3966.86	9.83607	-5.6
637	-6.37	3910		3910	3974	11.8827	-4.1
638	-6.38	3917.14		3917.14	3981.14	10.9275	-4.4
639	-6.39	3924.29		3924.29	3988.29	12.7263	-6
640	-6.4	3931.43		3931.43	3995.43	11.0957	-4.9
641	-6.41	3938.57		3938.57	4002.57	11.8707	-6.1
642	-6.42	3945.71		3945.71	4009.71	11.4806	-4.7
643	-6.43	3952.86		3952.86	4016.86	12.2848	-6.7
644	-6.44	3960		3960	4024	14.938	-6.6
645	-6.45	3967.14		3967.14	4031.14	13.2248	-2.7
646	-6.46	3974.29		3974.29	4038.29	13.0166	-4.5
647	-6.47	3981.43		3981.43	4045.43	14.5366	-6.5
648	-6.48	3988.57		3988.57	4052.57	13.1409	-4.3
649	-6.49	3995.71		3995.71	4059.71	13.4743	-5.1
650	-6.5	4002.86		4002.86	4066.86	14.3202	-4.6
651	-6.51	4010		4010	4074	13.0992	-4.3
652	-6.52	4017.14		4017.14	4081.14	13.4908	-2.6
653	-6.53	4024.29		4024.29	4088.29	12.5547	-1.8
654	-6.54	4031.43		4031.43	4095.43	12.9149	-4.5
655	-6.55	4038.57		4038.57	4102.57	12.9381	-4.5
656	-6.56	4045.71		4045.71	4109.71	12.3457	-5.1
657	-6.57	4052.86		4052.86	4116.86	11.4805	-4.4
658	-6.58	4060		4060	4124	11.8807	-4.1
659	-6.59	4067.14		4067.14	4131.14	12.6316	-5.1
660	-6.6	4074.29		4074.29	4138.29	12.0555	-3.6
661	-6.61	4081.43		4081.43	4145.43	11.6779	2.1
662	-6.62	4088.57		4088.57	4152.57	10.7514	-1.7
663	-6.63	4095.71		4095.71	4159.71	10.4265	2
664	-6.64	4102.86		4102.86	4166.86	10.5795	1.7
665	-6.65	4110		4110	4174	10.8787	3.4
666	-6.66	4117.14		4117.14	4181.14	11.8009	15.7
667	-6.67	4124.29		4124.29	4188.29	10.9873	0.4
668	-6.68	4131.43		4131.43	4195.43	11.3636	39.8
669	-6.69	4138.57		4138.57	4202.57	12.3104	-0.8
670	-6.7	4145.71		4145.71	4209.71	9.95851	5.4
671	-6.71	4152.86		4152.86	4216.86	13.3213	8.9
672	-6.72	4160		4160	4224	13.9553	7.8
673	-6.73	4167.14		4167.14	4231.14	12.0739	2.3
674	-6.74	4174.29		4174.29	4238.29	13.3687	2.9
675	-6.75	4181.43		4181.43	4245.43	14.3705	4
676	-6.76	4188.57		4188.57	4252.57	14.5985	19.1
677	-6.77	4195.71		4195.71	4259.71	13.2385	59.9
678	-6.78	4202.86		4202.86	4266.86	12.2762	-2.7
679	-6.79	4210		4210	4274	11.6362	-4.6
680	-6.8	4217.14		4217.14	4281.14	11.6206	-3.7
681	-6.81	4224.29		4224.29	4288.29	12.9305	16.5
682	-6.82	4231.43		4231.43	4295.43	16.1668	-2.4
683	-6.83	4238.57		4238.57	4302.57	13.75	-1.6
684	-6.84	4245.71		4245.71	4309.71	12.6912	-3.7
685	-6.85	4252.86		4252.86	4316.86	12.5883	-5.2
686	-6.86	4260		4260	4324	12.1434	-5.8
687	-6.87	4267.14		4267.14	4331.14	12.3088	-4.3
688	-6.88	4274.29		4274.29	4338.29	13.0406	-2
689	-6.89	4281.43		4281.43	4345.43	13.5398	1.7
690	-6.9	4288.57		4288.57	4352.57	12.8855	-0.5
691	-6.91	4295.71		4295.71	4359.71	12.4693	-1.5
692	-6.92	4302.86		4302.86	4366.86	12.3483	5.1
693	-6.93	4310		4310	4374	12.1311	2.5
694	-6.94	4317.14		4317.14	4381.14	12.7107	0.7
695	-6.95	4324.29		4324.29	4388.29	14.0758	-1.3
696	-6.96	4331.43		4331.43	4395.43	17.5047	3.6
697	-6.97	4338.57		4338.57	4402.57	15.0808	11.6
698	-6.98	4345.71		4345.71	4409.71	14.8984	11.4
699	-6.99	4352.86		4352.86	4416.86	17.4651	3.6
700	-7	4360		4360	4424	17.9886	9.6

## Sheet: Wilkerson Creek
Depth in core (cm)	meters BSL	Age bottom ybp 1950	Age top ybp 1950	Age composite ybp 1950	Age ybp 2014	TOM	MagSusc (SI Units)
38	-0.38	-260.25	-63.83	-63.83	0.17	36.3475	-3.4		y=-0.0016x-0.7964			185
39	-0.39	-254	-60.8	-60.8	3.2	33.7687	-2.3		x=(y+0.7964)/(-0.0016)			3.03279
40	-0.4	-247.75	-57.77	-57.77	6.23	33.7995	-1.8
41	-0.41	-241.5	-54.74	-54.74	9.26	34.2334	-2.4
42	-0.42	-235.25	-51.71	-51.71	12.29	37.6289	-3.6						-1.315	115
43	-0.43	-229	-48.68	-48.68	15.32	35.9486	-3.8
44	-0.44	-222.75	-45.65	-45.65	18.35	34.5794	-4.4
45	-0.45	-216.5	-42.62	-42.62	21.38	37.0016	-4
46	-0.46	-210.25	-39.59	-39.59	24.41	35.9937	-3.8
47	-0.47	-204	-36.56	-36.56	27.44	38.1264	-4.2
48	-0.48	-197.75	-33.53	-33.53	30.47	37.6443	-5.6
49	-0.49	-191.5	-30.5	-30.5	33.5	41.0169	-5.3
50	-0.5	-185.25	-27.47	-27.47	36.53	42.7105	-4.8
51	-0.51	-179	-24.44	-24.44	39.56	46.383	-4.6
52	-0.52	-172.75	-21.41	-21.41	42.59	47.0674	-4.9
53	-0.53	-166.5	-18.38	-18.38	45.62	47.0339	-6
54	-0.54	-160.25	-15.35	-15.35	48.65	46.7742	-6.7
55	-0.55	-154	-12.32	-12.32	51.68	47.8571	-6.3
56	-0.56	-147.75	-9.29	-9.29	54.71	46.2385	-6.5
57	-0.57	-141.5	-6.26	-6.26	57.74	50.6696	-5.9
58	-0.58	-135.25	-3.23	-3.23	60.77	45.8738	-6
59	-0.59	-129	-0.2	-0.2	63.8	43.2577	-6.1
60	-0.6	-122.75	2.83	2.83	66.83	41.4322	-6.3
61	-0.61	-116.5	5.86	5.86	69.86	38.3562	-5.9
62	-0.62	-110.25	8.89	8.89	72.89	35.1816	-6.1
63	-0.63	-104	11.92	11.92	75.92	43.8395	-6.4
64	-0.64	-97.75	14.95	14.95	78.95	42.7083	-7
65	-0.65	-91.5	17.98	17.98	81.98	40	-7.1
66	-0.66	-85.25	21.01	21.01	85.01	36.4444	-6.7
67	-0.67	-79	24.04	24.04	88.04	37.581	-6.4
68	-0.68	-72.75	27.07	27.07	91.07	37.6596
69	-0.69	-66.5	30.1	30.1	94.1	40.796	-6.8
70	-0.7	-60.25	33.13	33.13	97.13	29.3233	-6.8
71	-0.71	-54	36.16	36.16	100.16	23.2673	-5.9
72	-0.72	-47.75	39.19	39.19	103.19	25.9773	-6
73	-0.73	-41.5	42.22	42.22	106.22	30.9045	-5.9
74	-0.74	-35.25	45.25	45.25	109.25	34.1379	-6.5
75	-0.75	-29	48.28	48.28	112.28	32.0635	-6.8
76	-0.76	-22.75	51.31	51.31	115.31	36.5155	-6.7
77	-0.77	-16.5	54.34	54.34	118.34	38.0753	-6.5
78	-0.78	-10.25	57.37	57.37	121.37	33.7553	-5.8
79	-0.79	-4	60.4	60.4	124.4	38.4405	-6.4
80	-0.8	2.25	63.43	63.43	127.43	44.2656	-6.5
81	-0.81	8.5	66.46	66.46	130.46	48.0969	-6.8
82	-0.82	14.75	69.49	69.49	133.49		-6.6
83	-0.83	21	72.52	72.52	136.52	45.4545	-5.9
84	-0.84	27.25	75.55	75.55	139.55	47.3684	-6.4
85	-0.85	33.5	78.58	78.58	142.58	41.8231	-6.6
86	-0.86	39.75	81.61	81.61	145.61	32.0084	-6.7
87	-0.87	46	84.64	84.64	148.64	34.3091	-6.9
88	-0.88	52.25	87.67	87.67	151.67	32.3607	-5.8
89	-0.89	58.5	90.7	90.7	154.7	35.9712	-6.1
90	-0.9	64.75	93.73	93.73	157.73	39.5833	-6.1
91	-0.91	71	96.76	96.76	160.76	44.3452	-6.2
92	-0.92	77.25	99.79	99.79	163.79	41.7404	-6.5
93	-0.93	83.5	102.82	102.82	166.82	43.418	-5.6
94	-0.94	89.75	105.85	105.85	169.85	45.6432	-6.1
95	-0.95	96	108.88	108.88	172.88	47.2332	-5.8
96	-0.96	102.25	111.91	111.91	175.91	49.4272	-6.2
97	-0.97	108.5	114.94	114.94	178.94	44.4706	-6.5
98	-0.98	114.75	117.97	117.97	181.97	55.0388	-5.7
99	-0.99	121		121	185	35.2657	-6.1
100	-1	127.25		127.25	191.25	36.5854	-6.4
121	-1.21	258.5		258.5	322.5		-6.7
122	-1.22	264.75		264.75	328.75	26.5823	-6.7
123	-1.23	271		271	335	24.5989	-4.8
124	-1.24	277.25		277.25	341.25	28.5714	-3.5
125	-1.25	283.5		283.5	347.5	25.6746	-4.5
126	-1.26	289.75		289.75	353.75	24.6614	-5.4
127	-1.27	296		296	360	17.4051	-5.5
128	-1.28	302.25		302.25	366.25	18.7462	-4.5
129	-1.29	308.5		308.5	372.5	17.5314	-5.2
130	-1.3	314.75		314.75	378.75	18.3504	-5.5
131	-1.31	321		321	385	10.9063	-5.3
132	-1.32	327.25		327.25	391.25	12.4896	-5.3
133	-1.33	333.5		333.5	397.5	24.7253	-6.3
134	-1.34	339.75		339.75	403.75	34.0136	-5.7
135	-1.35	346		346	410	35.7759	-6.5
136	-1.36	352.25		352.25	416.25	48.2436	-6.3
137	-1.37	358.5		358.5	422.5	55.079	-6.9
138	-1.38	364.75		364.75	428.75	51.5487	-6.5
139	-1.39	371		371	435	49.8715	-7.1
140	-1.4	377.25		377.25	441.25	54.5161	-7.5
141	-1.41	383.5		383.5	447.5	52.5	-7.6
142	-1.42	389.75		389.75	453.75	38.0531	-7.6
143	-1.43	396		396	460	31.2821	-7.1
144	-1.44	402.25		402.25	466.25	29.0404	-7.5
145	-1.45	408.5		408.5	472.5	33.0986	-7.6
146	-1.46	414.75		414.75	478.75	29.1793	-7.7
147	-1.47	421		421	485	30	-7.9
148	-1.48	427.25		427.25	491.25	27.6451	-7.1
149	-1.49	433.5		433.5	497.5	27.6753	-7.5
150	-1.5	439.75		439.75	503.75	27.0677	-7.5
151	-1.51	446		446	510	27.6423	-7.4
152	-1.52	452.25		452.25	516.25	27.6265	-7.2
153	-1.53	458.5		458.5	522.5	28.3063	-6.6
154	-1.54	464.75		464.75	528.75	27.5194	-6.5
155	-1.55	471		471	535	29.1883	-6.6
156	-1.56	477.25		477.25	541.25	30.4124	-6.5
157	-1.57	483.5		483.5	547.5	38.2688	-6.6
158	-1.58	489.75		489.75	553.75	38.3613	-5.8
159	-1.59	496		496	560	36.0558	-5.8
160	-1.6	502.25		502.25	566.25	38.1944	-5.9
161	-1.61	508.5		508.5	572.5	38.6221	-6
162	-1.62	514.75		514.75	578.75	37.7604	-6.2
163	-1.63	521		521	585	37.6782	-4.6
164	-1.64	527.25		527.25	591.25	35.7488	-5.2
165	-1.65	533.5		533.5	597.5	37.3737	-5.4
166	-1.66	539.75		539.75	603.75	35.0711	-5.7
167	-1.67	546		546	610	40.0593	-5.7
168	-1.68	552.25		552.25	616.25	39.5303	-5
169	-1.69	558.5		558.5	622.5	45.122	-5.3
170	-1.7	564.75		564.75	628.75	54.9206	-5.2
171	-1.71	571		571	635	43.5211	-5.5
172	-1.72	577.25		577.25	641.25	46.5228	-5.8
173	-1.73	583.5		583.5	647.5	50.9804	-4.9
174	-1.74	589.75		589.75	653.75	64.7059	-4.9
175	-1.75	596		596	660	51.9822	-4.9
176	-1.76	602.25		602.25	666.25	43.6975	-5
177	-1.77	608.5		608.5	672.5	39.2683	-5
178	-1.78	614.75		614.75	678.75	41.791	-4.1
179	-1.79	621		621	685	27.0707	-4.8
184	-1.84	652.25		652.25	716.25	29.4118	-5.1
185	-1.85	658.5		658.5	722.5	22.6164	-5.4
186	-1.86	664.75		664.75	728.75	19.8708	-5.2
187	-1.87	671		671	735	21.5797	-3.9
188	-1.88	677.25		677.25	741.25	22.6644	-4
189	-1.89	683.5		683.5	747.5	26.9737	-4.1
190	-1.9	689.75		689.75	753.75	21.9672	-4.1
191	-1.91	696		696	760	24.8744	-4.4
192	-1.92	702.25		702.25	766.25	20.7865	-4.3
193	-1.93	708.5		708.5	772.5	28.5256	-4.3
194	-1.94	714.75		714.75	778.75	22.6115	-4
195	-1.95	721		721	785	26.097	-4
196	-1.96	727.25		727.25	791.25	25.641	-3.8
197	-1.97	733.5		733.5	797.5	23.1343	-3.9
198	-1.98	739.75		739.75	803.75	23.1308	-3.9
199	-1.99	746		746	810	25.2525	-3.7
206	-2.06	789.75		789.75	853.75	24	-3.8
207	-2.07	796		796	860	34.8958	-4.1
208	-2.08	802.25		802.25	866.25	26.2857	-3.6
209	-2.09	808.5		808.5	872.5	33.0909	-4.1
210	-2.1	814.75		814.75	878.75	24.0079	-4.4
211	-2.11	821		821	885	29.8137	-4.8
212	-2.12	827.25		827.25	891.25	31.7495	-6.1
213	-2.13	833.5		833.5	897.5	23.9564	-6.4
214	-2.14	839.75		839.75	903.75	32.6034	-6
215	-2.15	846		846	910	25.0965	-6.2
216	-2.16	852.25		852.25	916.25	30.4498	-6.3
217	-2.17	858.5		858.5	922.5	26.5683	-5.8
218	-2.18	864.75		864.75	928.75	32.6241	-6.1
219	-2.19	871		871	935	24.8773	-5.8
220	-2.2	877.25		877.25	941.25	23.991	-6.9
221	-2.21	883.5		883.5	947.5	27.1768	-7
222	-2.22	889.75		889.75	953.75	26.7738	-7.1
223	-2.23	896		896	960	26.2391	-7.2
224	-2.24	902.25		902.25	966.25	24.7634	-7
225	-2.25	908.5		908.5	972.5	25.1892	-6.4
226	-2.26	914.75		914.75	978.75	26.499	-6.7
227	-2.27	921		921	985	25.3927	-6.9
228	-2.28	927.25		927.25	991.25	25.8578	-7
229	-2.29	933.5		933.5	997.5	24.5261	-7.3
230	-2.3	939.75		939.75	1003.75		-6.9
231	-2.31	946		946	1010	23.5772	-7.2
232	-2.32	952.25		952.25	1016.25	25.0871	-7.7
233	-2.33	958.5		958.5	1022.5	25.6966	-7.7
234	-2.34	964.75		964.75	1028.75	24.6287	-8
235	-2.35	971		971	1035	22.7444	-7.8
236	-2.36	977.25		977.25	1041.25	21.721	-8.5
237	-2.37	983.5		983.5	1047.5	21.9313	-9
238	-2.38	989.75		989.75	1053.75	23.9108	-9
239	-2.39	996		996	1060	20.9449	-9.3
240	-2.4	1002.25		1002.25	1066.25	23.7237	-8.9
241	-2.41	1008.5		1008.5	1072.5	28.2127	-9.5
242	-2.42	1014.75		1014.75	1078.75	21.1286	-9.9
243	-2.43	1021		1021	1085	21.3987	-9.8
244	-2.44	1027.25		1027.25	1091.25	20.6199	-10.2
245	-2.45	1033.5		1033.5	1097.5	20.3874	-9.5
246	-2.46	1039.75		1039.75	1103.75	24.9119	-10.7
247	-2.47	1046		1046	1110	23.7079	-11
248	-2.48	1052.25		1052.25	1116.25	26.8156	-11.1
249	-2.49	1058.5		1058.5	1122.5	25.4902	-11.7
250	-2.5	1064.75		1064.75	1128.75	23.7463	-11.3
251	-2.51	1071		1071	1135	24.4286	-11.8
252	-2.52	1077.25		1077.25	1141.25	23.876	-11.9
253	-2.53	1083.5		1083.5	1147.5	21.5956	-12.2
254	-2.54	1089.75		1089.75	1153.75	20.1047	-12.3
255	-2.55	1096		1096	1160	20.5426	-11.9
256	-2.56	1102.25		1102.25	1166.25	18.0451	-12.3
257	-2.57	1108.5		1108.5	1172.5	17.387	-12.1
258	-2.58	1114.75		1114.75	1178.75	16.186	-11.9
259	-2.59	1121		1121	1185	15.9456	-11.3
260	-2.6	1127.25		1127.25	1191.25	15.9861	-10.4
261	-2.61	1133.5		1133.5	1197.5	16.1168	-10.8
262	-2.62	1139.75		1139.75	1203.75	17.256	-10.6
263	-2.63	1146		1146	1210	16.6042	-10.4
264	-2.64	1152.25		1152.25	1216.25	17.3418	-10.6
265	-2.65	1158.5		1158.5	1222.5	17.4648	-9.8
266	-2.66	1164.75		1164.75	1228.75	17.4625	-9.8
267	-2.67	1171		1171	1235	17.3868	-10
268	-2.68	1177.25		1177.25	1241.25	16.7579	-9.8
269	-2.69	1183.5		1183.5	1247.5	16.4671	-10
270	-2.7	1189.75		1189.75	1253.75	16.0407	-9.1
271	-2.71	1196		1196	1260	15.9459	-9.3
272	-2.72	1202.25		1202.25	1266.25	16.4844	-9.5
273	-2.73	1208.5		1208.5	1272.5	16.2386	-9.7
274	-2.74	1214.75		1214.75	1278.75	15.8349	-9.7
275	-2.75	1221		1221	1285	16.3452	-10
276	-2.76	1227.25		1227.25	1291.25	17.1518	-9.3
277	-2.77	1233.5		1233.5	1297.5	14.6754	-9.8
278	-2.78	1239.75		1239.75	1303.75	14.0299	-9.8
279	-2.79	1246		1246	1310	15.0108	-9.6
280	-2.8	1252.25		1252.25	1316.25	15.6917	-9.3
281	-2.81	1258.5		1258.5	1322.5	14.126	-8.8
282	-2.82	1264.75		1264.75	1328.75	12.2918	-8.6
283	-2.83	1271		1271	1335	13.6922	-8.4
284	-2.84	1277.25		1277.25	1341.25	17.3913	-9.1
285	-2.85	1283.5		1283.5	1347.5	18.4024	-8.5
286	-2.86	1289.75		1289.75	1353.75	21.875	-7.8
287	-2.87	1296		1296	1360		-7.8
288	-2.88	1302.25		1302.25	1366.25	19.9595	-8.2
289	-2.89	1308.5		1308.5	1372.5	20.9774	-8.6
290	-2.9	1314.75		1314.75	1378.75	20.5882	-9.1
291	-2.91	1321		1321	1385	19.9134	-8.3
292	-2.92	1327.25		1327.25	1391.25	16.1765	-8.3
293	-2.93	1333.5		1333.5	1397.5	16.8571	-8
294	-2.94	1339.75		1339.75	1403.75	16.4179	-8
295	-2.95	1346		1346	1410	15.2401	-7.8
296	-2.96	1352.25		1352.25	1416.25	16.1785	-6.7
297	-2.97	1358.5		1358.5	1422.5	17.3913	-7.1
298	-2.98	1364.75		1364.75	1428.75	17.6534	-7.5
299	-2.99	1371		1371	1435	18.136	-7.6
300	-3	1377.25		1377.25	1441.25	20.259	-7.8
304	-3.04	1402.25		1402.25	1466.25	18.9873	-7.5
305	-3.05	1408.5		1408.5	1472.5	18.8475	-8.1
306	-3.06	1414.75		1414.75	1478.75	18.34	-8.4
307	-3.07	1421		1421	1485	18.9103	-8.6
308	-3.08	1427.25		1427.25	1491.25	17.4721	-8.8
309	-3.09	1433.5		1433.5	1497.5	17.2571	-9.3
310	-3.1	1439.75		1439.75	1503.75	16.5501	-3.6
311	-3.11	1446		1446	1510	16.3823	-3.8
312	-3.12	1452.25		1452.25	1516.25	17.2414	-4.1
313	-3.13	1458.5		1458.5	1522.5	17.9104	-4.1
314	-3.14	1464.75		1464.75	1528.75	17.6923	-4.2
315	-3.15	1471		1471	1535	15.3752	-4.1
316	-3.16	1477.25		1477.25	1541.25	11.5279	-4.5
317	-3.17	1483.5		1483.5	1547.5	10.7607	-4.9
318	-3.18	1489.75		1489.75	1553.75	9.72644	-5
319	-3.19	1496		1496	1560	9.70677	-5.2
320	-3.2	1502.25		1502.25	1566.25	10.1171	-4.3
321	-3.21	1508.5		1508.5	1572.5	9.38967	-2.6
322	-3.22	1514.75		1514.75	1578.75	9.77444	-2.4
323	-3.23	1521		1521	1585	9.53113	-2.5
324	-3.24	1527.25		1527.25	1591.25	9.50673	-2.4
325	-3.25	1533.5		1533.5	1597.5	10.8374	-2.1
326	-3.26	1539.75		1539.75	1603.75	11.8247	-2
327	-3.27	1546		1546	1610	10.8264	-2.5
328	-3.28	1552.25		1552.25	1616.25	11.2598	-2.6
329	-3.29	1558.5		1558.5	1622.5	8.28437	-2.2
330	-3.3	1564.75		1564.75	1628.75	8.94569	-1.9
331	-3.31	1571		1571	1635	10.596	-1.8
332	-3.32	1577.25		1577.25	1641.25	9.50872	-1.9
333	-3.33	1583.5		1583.5	1647.5	3.98084	-1.8
334	-3.34	1589.75		1589.75	1653.75	9.45946	-2.1
335	-3.35	1596		1596	1660	9.24437	-1.9
336	-3.36	1602.25		1602.25	1666.25	4.69799	-1.9
337	-3.37	1608.5		1608.5	1672.5	2.20835	-2.2
338	-3.38	1614.75		1614.75	1678.75	5.71429	-2.5
339	-3.39	1621		1621	1685	7.8341	-2.4
340	-3.4	1627.25		1627.25	1691.25	6.27996	-2.4
341	-3.41	1633.5		1633.5	1697.5	7.14726	-2.4
342	-3.42	1639.75		1639.75	1703.75	7.52744	-2.8
343	-3.43	1646		1646	1710	8.02292	-2.7
344	-3.44	1652.25		1652.25	1716.25	7.66308	-2.6
345	-3.45	1658.5		1658.5	1722.5	8	-3.2
346	-3.46	1664.75		1664.75	1728.75	7.20851	-1.6
347	-3.47	1671		1671	1735	6.71602	-2.4
348	-3.48	1677.25		1677.25	1741.25	7.01531	-0.6
349	-3.49	1683.5		1683.5	1747.5	8.44646	-1.6
350	-3.5	1689.75		1689.75	1753.75	7.12468	-0.9
351	-3.51	1696		1696	1760	6.56566	-1.5
352	-3.52	1702.25		1702.25	1766.25	6.381	-1.8
353	-3.53	1708.5		1708.5	1772.5	9.76059	-1.8
354	-3.54	1714.75		1714.75	1778.75	6.79785	-1.5
355	-3.55	1721		1721	1785	6.70363	-0.7
356	-3.56	1727.25		1727.25	1791.25	6.66989	-0.9
357	-3.57	1733.5		1733.5	1797.5	7.22284	-1.4
358	-3.58	1739.75		1739.75	1803.75	7.54272	-1.7
359	-3.59	1746		1746	1810	7.27802	-1.3
360	-3.6	1752.25		1752.25	1816.25	8.66935	-1.7
361	-3.61	1758.5		1758.5	1822.5	8.48142	-2.5
362	-3.62	1764.75		1764.75	1828.75	8.74089	-1.3
363	-3.63	1771		1771	1835	8.84407	-0.4
364	-3.64	1777.25		1777.25	1841.25	9.89305	-0.9
365	-3.65	1783.5		1783.5	1847.5	9.51437	0
366	-3.66	1789.75		1789.75	1853.75	9.78363	-0.5
367	-3.67	1796		1796	1860	9.84665	-0.4
368	-3.68	1802.25		1802.25	1866.25	10.4598	-0.7
369	-3.69	1808.5		1808.5	1872.5	10.6593	-1.1
370	-3.7	1814.75		1814.75	1878.75	11.7277	-0.6
371	-3.71	1821		1821	1885	10.1337	-1
372	-3.72	1827.25		1827.25	1891.25	8.18792	-1
373	-3.73	1833.5		1833.5	1897.5	9.18231	-1.3
374	-3.74	1839.75		1839.75	1903.75	11.411	-1.7
375	-3.75	1846		1846	1910	10.9821	-0.9
376	-3.76	1852.25		1852.25	1916.25	10.4671	-1.1
377	-3.77	1858.5		1858.5	1922.5	10.2518	-1.4
378	-3.78	1864.75		1864.75	1928.75	5.20465	-0.9
379	-3.79	1871		1871	1935	8.78661	-0.5
380	-3.8	1877.25		1877.25	1941.25	9.22587	0
381	-3.81	1883.5		1883.5	1947.5	7.94118	-0.5
382	-3.82	1889.75		1889.75	1953.75	8.01815	-1.5
383	-3.83	1896		1896	1960	8.31316	-1.3
384	-3.84	1902.25		1902.25	1966.25	8.34684	-1.9
385	-3.85	1908.5		1908.5	1972.5	8.73937	-2.4
386	-3.86	1914.75		1914.75	1978.75	8.87154	-2.9
387	-3.87	1921		1921	1985	8.78049	-2.4
388	-3.88	1927.25		1927.25	1991.25	8.49802	-2.4
389	-3.89	1933.5		1933.5	1997.5	6.69291	-1.6
390	-3.9	1939.75		1939.75	2003.75	6.46298	-1.8
391	-3.91	1946		1946	2010	6.92964	-2.2
392	-3.92	1952.25		1952.25	2016.25	7.03125	-2
393	-3.93	1958.5		1958.5	2022.5	6.58824	-1.9
394	-3.94	1964.75		1964.75	2028.75	6.91114	-2.4
395	-3.95	1971		1971	2035	6.20861	-2.1
396	-3.96	1977.25		1977.25	2041.25	6.5389	-2.4
397	-3.97	1983.5		1983.5	2047.5	6.57143	-2.1
398	-3.98	1989.75		1989.75	2053.75		-3.1
399	-3.99	1996		1996	2060	6.99357	-3.6
400	-4	2002.25		2002.25	2066.25		-2.4
401	-4.01	2008.5		2008.5	2072.5	11.8056	-1.3
402	-4.02	2014.75		2014.75	2078.75	9.09717	-1.6
403	-4.03	2021		2021	2085	10.7432	-2
404	-4.04	2027.25		2027.25	2091.25	8.38509	-2.5
405	-4.05	2033.5		2033.5	2097.5	2.83429	-2.1
406	-4.06	2039.75		2039.75	2103.75	6.7681	-2.7
407	-4.07	2046		2046	2110	6.4455	-3.3
408	-4.08	2052.25		2052.25	2116.25	6.36805	-3.4
409	-4.09	2058.5		2058.5	2122.5	7.5339	-3.6
410	-4.1	2064.75		2064.75	2128.75	7.04501	-3.6
411	-4.11	2071		2071	2135	7.25995	-0.8
412	-4.12	2077.25		2077.25	2141.25	5.77925	-1.7
413	-4.13	2083.5		2083.5	2147.5	5.88235	-1.9
414	-4.14	2089.75		2089.75	2153.75	6.3399	-3.1
415	-4.15	2096		2096	2160	6.10481	-2.1
416	-4.16	2102.25		2102.25	2166.25	18.9281	-1.3
417	-4.17	2108.5		2108.5	2172.5	9.84308	-1.5
418	-4.18	2114.75		2114.75	2178.75	5.48128	-2.2
419	-4.19	2121		2121	2185	5.31868	-2
420	-4.2	2127.25		2127.25	2191.25	5.26971	-2.9
421	-4.21	2133.5		2133.5	2197.5	5.13401	-1.9
422	-4.22	2139.75		2139.75	2203.75	5.2958	0.6
423	-4.23	2146		2146	2210	5.05561	-2
424	-4.24	2152.25		2152.25	2216.25	4.94479	-4.3
425	-4.25	2158.5		2158.5	2222.5	5.16252	-3.3
426	-4.26	2164.75		2164.75	2228.75	5.51962	-2.6
427	-4.27	2171		2171	2235	5.28715	-2.9
428	-4.28	2177.25		2177.25	2241.25	5.4902	-2.4
429	-4.29	2183.5		2183.5	2247.5	5.28037	-2.1
430	-4.3	2189.75		2189.75	2253.75	5.44554	-1.5
431	-4.31	2196		2196	2260	5.50064	-1.7
432	-4.32	2202.25		2202.25	2266.25	5.55985	-1.9
433	-4.33	2208.5		2208.5	2272.5	6.02899	-2.4
434	-4.34	2214.75		2214.75	2278.75	6.09339
435	-4.35	2221		2221	2285	5.807	-2.2
436	-4.36	2227.25		2227.25	2291.25	5.85868	-2
437	-4.37	2233.5		2233.5	2297.5	6.69895	-1.6
438	-4.38	2239.75		2239.75	2303.75	8.93744	-0.7
439	-4.39	2246		2246	2310	6.29685	-0.2
440	-4.4	2252.25		2252.25	2316.25	6.44512	-2.4
441	-4.41	2258.5		2258.5	2322.5	7.13145	-2.6
442	-4.42	2264.75		2264.75	2328.75	6.03345	-2.5
443	-4.43	2271		2271	2335	6.06223	-2.4
444	-4.44	2277.25		2277.25	2341.25	6.03829	-2.3
445	-4.45	2283.5		2283.5	2347.5	6.00119	-2
446	-4.46	2289.75		2289.75	2353.75	6.00112	0
447	-4.47	2296		2296	2360		-1.5
448	-4.48	2302.25		2302.25	2366.25	6.44242	-2.6
449	-4.49	2308.5		2308.5	2372.5	6.3244	-3.8
450	-4.5	2314.75		2314.75	2378.75	6.31037	-2.5
451	-4.51	2321		2321	2385	6.17496	-1.7
452	-4.52	2327.25		2327.25	2391.25	6.27306	0
453	-4.53	2333.5		2333.5	2397.5	5.93434	-3
454	-4.54	2339.75		2339.75	2403.75	5.88556	-4.3
455	-4.55	2346		2346	2410	5.91581	-3.4
456	-4.56	2352.25		2352.25	2416.25	5.92105	-2.3
457	-4.57	2358.5		2358.5	2422.5	5.89198	0.1
458	-4.58	2364.75		2364.75	2428.75	6.16143	0.6
459	-4.59	2371		2371	2435	6.89922	-0.1
460	-4.6	2377.25		2377.25	2441.25	6.31649	-0.3
461	-4.61	2383.5		2383.5	2447.5	5.54217	-0.6
462	-4.62	2389.75		2389.75	2453.75	4.62428	-0.4
463	-4.63	2396		2396	2460	5.67227	0
464	-4.64	2402.25		2402.25	2466.25	5.87564	0.1
465	-4.65	2408.5		2408.5	2472.5	5.74777	0
466	-4.66	2414.75		2414.75	2478.75	5.82524	0
467	-4.67	2421		2421	2485	5.70687	0
468	-4.68	2427.25		2427.25	2491.25	7.30446	-0.4
469	-4.69	2433.5		2433.5	2497.5	5.6962	-0.7
470	-4.7	2439.75		2439.75	2503.75	5.30368	-0.4
471	-4.71	2446		2446	2510	5.09674	-0.6
472	-4.72	2452.25		2452.25	2516.25	5.04087	-0.6
473	-4.73	2458.5		2458.5	2522.5	5.06545	-0.6
474	-4.74	2464.75		2464.75	2528.75	4.74763	-0.7
475	-4.75	2471		2471	2535	4.82406
476	-4.76	2477.25		2477.25	2541.25	4.69095
477	-4.77	2483.5		2483.5	2547.5	4.37367	-0.4
478	-4.78	2489.75		2489.75	2553.75	4.29224	4
479	-4.79	2496		2496	2560	4.05638	2.4
480	-4.8	2502.25		2502.25	2566.25	3.71009	-0.4
481	-4.81	2508.5		2508.5	2572.5	4.06421	-0.9
482	-4.82	2514.75		2514.75	2578.75	4.18982	-0.7
483	-4.83	2521		2521	2585	4.12324	-0.6
484	-4.84	2527.25		2527.25	2591.25	4.13819	-0.8
485	-4.85	2533.5		2533.5	2597.5	4.0099	-1.5
486	-4.86	2539.75		2539.75	2603.75	3.91181	-1.3
487	-4.87	2546		2546	2610	3.66911	-1.7
488	-4.88	2552.25		2552.25	2616.25	4.1259	-0.9
489	-4.89	2558.5		2558.5	2622.5	3.56013	1
490	-4.9	2564.75		2564.75	2628.75	3.85542	-0.5
491	-4.91	2571		2571	2635	4.14614	-0.7
492	-4.92	2577.25		2577.25	2641.25	3.7087	-0.6
493	-4.93	2583.5		2583.5	2647.5	3.99842	-0.8
494	-4.94	2589.75		2589.75	2653.75	1.66271	-0.5
495	-4.95	2596		2596	2660	4.33604	-0.8
496	-4.96	2602.25		2602.25	2666.25	4.10435	-0.7
497	-4.97	2608.5		2608.5	2672.5	4.44994	-0.7
498	-4.98	2614.75		2614.75	2678.75	4.46927	-0.8
499	-4.99	2621		2621	2685	5.38821	-0.6
500	-5	2627.25		2627.25	2691.25	5.37764	-1.2
501	-5.01	2633.5		2633.5	2697.5	6.76364	-0.9
502	-5.02	2639.75		2639.75	2703.75	5.51084	0.9
503	-5.03	2646		2646	2710	6.37066	-0.6
504	-5.04	2652.25		2652.25	2716.25	4.80602	-0.1
505	-5.05	2658.5		2658.5	2722.5	5.8133	-1.3
506	-5.06	2664.75		2664.75	2728.75	6.60066	-1.3
507	-5.07	2671		2671	2735	4.87385	0.2
508	-5.08	2677.25		2677.25	2741.25	4.63035	-0.7
509	-5.09	2683.5		2683.5	2747.5	5.33881	-2.8
510	-5.1	2689.75		2689.75	2753.75	4.64363	-3.9
511	-5.11	2696		2696	2760	4.90605	-3.4
512	-5.12	2702.25		2702.25	2766.25	5.22648	-0.8
513	-5.13	2708.5		2708.5	2772.5	4.9895	-0.5
514	-5.14	2714.75		2714.75	2778.75	4.83923	0
515	-5.15	2721		2721	2785	4.99808	0.8
516	-5.16	2727.25		2727.25	2791.25	5.11794	-1.4
517	-5.17	2733.5		2733.5	2797.5	5.00281	-1.2
518	-5.18	2739.75		2739.75	2803.75	5.23677	-0.5
519	-5.19	2746		2746	2810	5.44554	-0.2
520	-5.2	2752.25		2752.25	2816.25	5.82524	-2.3
521	-5.21	2758.5		2758.5	2822.5	5.51779	-1.9
522	-5.22	2764.75		2764.75	2828.75	5.63321	-2.1
523	-5.23	2771		2771	2835	6.04059	-1.5
524	-5.24	2777.25		2777.25	2841.25	5.655	-0.7
525	-5.25	2783.5		2783.5	2847.5	5.71429	-0.8
526	-5.26	2789.75		2789.75	2853.75		-1.2
527	-5.27	2796		2796	2860	5.66823	-2.5
528	-5.28	2802.25		2802.25	2866.25	5.55033	-1.2
529	-5.29	2808.5		2808.5	2872.5	5.93785	-0.8
530	-5.3	2814.75		2814.75	2878.75	6.00462	-1.7
531	-5.31	2821		2821	2885	5.64067	-2.3
532	-5.32	2827.25		2827.25	2891.25		-2.1
533	-5.33	2833.5		2833.5	2897.5	6.12472	-1.1
534	-5.34	2839.75		2839.75	2903.75	5.91954	-1
535	-5.35	2846		2846	2910	5.90164	-1.6
536	-5.36	2852.25		2852.25	2916.25	6.16055	0.8
537	-5.37	2858.5		2858.5	2922.5	6.16438	1.1
538	-5.38	2864.75		2864.75	2928.75	6.00733	0.9
539	-5.39	2871		2871	2935	6.15079	-1.2
540	-5.4	2877.25		2877.25	2941.25	6.04396	-0.4
541	-5.41	2883.5		2883.5	2947.5	6.14088	-1
542	-5.42	2889.75		2889.75	2953.75		-0.2
543	-5.43	2896		2896	2960	6.29787	0.5
544	-5.44	2902.25		2902.25	2966.25	5.86623	1.3
545	-5.45	2908.5		2908.5	2972.5	5.90104	0.1
546	-5.46	2914.75		2914.75	2978.75	5.98651	0.4
547	-5.47	2921		2921	2985	6.04865	0.6
548	-5.48	2927.25		2927.25	2991.25	6.23679	0.5
549	-5.49	2933.5		2933.5	2997.5	6.26118	0
550	-5.5	2939.75		2939.75	3003.75	6.09349	-1.7
551	-5.51	2946		2946	3010	6.00809	0.3
552	-5.52	2952.25		2952.25	3016.25	5.87248	3.2
553	-5.53	2958.5		2958.5	3022.5	5.99054	0.9
554	-5.54	2964.75		2964.75	3028.75	6.30741	7.2
555	-5.55	2971		2971	3035	6.36653	-0.2
556	-5.56	2977.25		2977.25	3041.25	6.14673	-0.7
557	-5.57	2983.5		2983.5	3047.5	6.30252	-0.5
558	-5.58	2989.75		2989.75	3053.75	6.46521	-0.7
559	-5.59	2996		2996	3060	6.45356	-1.5
560	-5.6	3002.25		3002.25	3066.25	6.78349	-1.8
561	-5.61	3008.5		3008.5	3072.5	6.77966	-2
562	-5.62	3014.75		3014.75	3078.75	6.57778	-2.5
563	-5.63	3021		3021	3085	6.50087	-2.1
564	-5.64	3027.25		3027.25	3091.25	6.62533	-1.6
565	-5.65	3033.5		3033.5	3097.5	6.40966	-1.9
566	-5.66	3039.75		3039.75	3103.75	6.56	-1.7
567	-5.67	3046		3046	3110	6.37744	-1.6
568	-5.68	3052.25		3052.25	3116.25	6.40927	-1.4
569	-5.69	3058.5		3058.5	3122.5	6.92821	-1.9
570	-5.7	3064.75		3064.75	3128.75	6.38788	-3.6
571	-5.71	3071		3071	3135	6.69621	-1.8
572	-5.72	3077.25		3077.25	3141.25	6.67787	-1.1
573	-5.73	3083.5		3083.5	3147.5	7.16473	-1.3
574	-5.74	3089.75		3089.75	3153.75	6.52819
575	-5.75	3096		3096	3160	6.86567	-0.7
576	-5.76	3102.25		3102.25	3166.25	6.55894	-0.8
577	-5.77	3108.5		3108.5	3172.5	6.49417	-1.3
578	-5.78	3114.75		3114.75	3178.75	6.92042
579	-5.79	3121		3121	3185	6.58174	-2.7
580	-5.8	3127.25		3127.25	3191.25	6.56518	-3.1
581	-5.81	3133.5		3133.5	3197.5	6.89278	-2.5
582	-5.82	3139.75		3139.75	3203.75	7.14286	-3.1
583	-5.83	3146		3146	3210	7.19626	-3.5
584	-5.84	3152.25		3152.25	3216.25	7.18728	-2.7
585	-5.85	3158.5		3158.5	3222.5	7.32283	-2.1
586	-5.86	3164.75		3164.75	3228.75	6.93548	-1.3
587	-5.87	3171		3171	3235	6.97837	-2.5
588	-5.88	3177.25		3177.25	3241.25	7.12644	-2.4
589	-5.89	3183.5		3183.5	3247.5	7.52119	-1.4
590	-5.9	3189.75		3189.75	3253.75	7.19665	-0.8
591	-5.91	3196		3196	3260	7.6198	-0.2
592	-5.92	3202.25		3202.25	3266.25	7.1028	-0.6
593	-5.93	3208.5		3208.5	3272.5	7.01169	0.1
594	-5.94	3214.75		3214.75	3278.75	7.05256	-1.1
595	-5.95	3221		3221	3285	7.18189	-0.8
596	-5.96	3227.25		3227.25	3291.25	7.18147	0
597	-5.97	3233.5		3233.5	3297.5	7.05596	-1.2
598	-5.98	3239.75		3239.75	3303.75	7.0488	-1.3
599	-5.99	3246		3246	3310	6.98557	-1.2
600	-6	3252.25		3252.25	3316.25	7.03235	-1.5

## Sheet: Mount Landing Creek
Depth in core (cm)	meters BSL	Age 1	Age 2 bottom ybp 1950	Age 2 top ybp 1950	AGE 2 ybp 1950 composite	Age 2 ybp 2014	TOM	MagSusc (SI Units)																					Core	m bsl	AGE 2 ybp 1950 composite	Age 2 ybp 2014	TOC
73	-0.73	507.111	228.429	-64	-64	0		-4		y=-.0018x+.1828																			74	-0.74	-46.037	17.963	32.1732
74	-0.74	512.667	235.571	-46.037	-46.037	17.963	32.17	-4		x=(y-.1828)/(-.0018)									17.963										80	-0.8	61.741	125.741	48.63
				-28.074	-28.074	35.926																							84	-0.84	133.593	197.593	48.6318
				-10.111	-10.111	53.889																							87	-0.87	187.482	251.482	37.3333
77	-0.77	529.333	257	7.852	7.852	71.852		-1		AGE 1					AGE 2														90	-0.9	241.371	305.371	47.9058
78	-0.78	534.889	264.143	25.815	25.815	89.815		7																					94	-0.94	313.223	377.223	43.7363
79	-0.79	540.444	271.286	43.778	43.778	107.778		8																					97	-0.97	367.112	431.112	54.5098
80	-0.8	546	278.429	61.741	61.741	125.741		-5																					100	-1	421.286	485.286	50.6977
81	-0.81	551.556	285.571	79.704	79.704	143.704		-6																								64
				97.667	97.667	161.667																							151	-1.51	785.571	849.571	54.6318
83	-0.83	562.667	299.857	115.63	115.63	179.63		-7																					154	-1.54	807	871	26.9155
84	-0.84	568.222	307	133.593	133.593	197.593	48.63																						157	-1.57	828.429	892.429	30.6368
85	-0.85	573.778	314.143	151.556	151.556	215.556		-5																					160	-1.6	849.857	913.857	52.7273
				169.519	169.519	233.519																							164	-1.64	878.429	942.429	35.7456
87	-0.87	584.889	328.429	187.482	187.482	251.482	37.33	-5																					167	-1.67	899.857	963.857	46.8165
				205.445	205.445	269.445																							170	-1.7	921.286	985.286	48.8273
89	-0.89	596	342.714	223.408	223.408	287.408		-6																					174	-1.74	949.857	1013.86	52.5253
90	-0.9	601.556	349.857	241.371	241.371	305.371	47.91																						177	-1.77	971.286	1035.29	46.3215
91	-0.91	607.111	357	259.334	259.334	323.334		-6																					180	-1.8	992.714	1056.71	31.4286
				277.297	277.297	341.297																							183	-1.83	1014.14	1078.14	13.6823
93	-0.93	618.222	371.286	295.26	295.26	359.26		-4																					186	-1.86	1035.57	1099.57	10.9079
94	-0.94	623.778	378.429	313.223	313.223	377.223	43.74																						189	-1.89	1057	1121	9.04491
95	-0.95	629.333	385.571	331.186	331.186	395.186		-6																					192	-1.92	1078.43	1142.43	9.67309
				349.149	349.149	413.149																							195	-1.95	1099.86	1163.86	10.0713
97	-0.97	640.444	399.857	367.112	367.112	431.112	54.51	-5																					198	-1.98	1121.29	1185.29	13.0855
				385.075	385.075	449.075																										64
99	-0.99	651.556	414.143	403.038	403.038	467.038		-5																					225	-2.25	1314.14	1378.14	9.85109
100	-1	657.111	421.286		421.286	485.286	50.7																						228	-2.28	1335.57	1399.57	11.12
150	-1.5	934.889	778.429		778.429	842.429		-7																					231	-2.31	1357	1421	9.47368
151	-1.51	940.444	785.571		785.571	849.571	54.63																						234	-2.34	1378.43	1442.43	10.4933
152	-1.52	946	792.714		792.714	856.714		-6																					237	-2.37	1399.86	1463.86	9.19023
154	-1.54	957.111	807		807	871	26.92	-1						Site	Core	Labcode	Sample depth in core (m)	**meters BSL	Uncorrected C-14 age	Error	##delta C-13	Calib-Julia-5-18 Median BP 1950	CalibJulia -	Calib Julia +	relative area under probability distribution				240	-2.4	1421.29	1485.29	9.118
156	-1.56	968.222	821.286		821.286	885.286		-8																					243	-2.43	1442.71	1506.71	12.2172
157	-1.57	973.778	828.429		828.429	892.429	30.64																						246	-2.46	1464.14	1528.14	11.2625
158	-1.58	979.333	835.571		835.571	899.571		-8						Mount Landing Creek	RA15-ML-C2	OS-120715	-1.6	-1.6	945	15	-14.78	849	53	26	0.754				249	-2.49	1485.57	1549.57	11.2903
160	-1.6	990.444	849.857		849.857	913.857	52.73	-8						Mount Landing Creek	RA15-ML-C5	OS-120716	-4.03	-4.03	2490	20	-21.79	2583	94	62	0.78				252	-2.52	1507	1571		-217.389
162	-1.62	1001.56	864.143		864.143	928.143		-9						Mount Landing Creek	RA15-ML-C7	OS-120743	-7	-7	3650	15	-19.41	3964	60	27	0.853				255	-2.55	1528.43	1592.43	11.0986
164	-1.64	1012.67	878.429		878.429	942.429	35.75	-8						Mount Landing Creek	RA15-ML-C8	OS-120822	-7.53	-7.53	3720	20	-14.09	4042	57	12	0.566				259	-2.59	1557	1621	20.8703
166	-1.66	1023.78	892.714		892.714	956.714		-7																					262	-2.62	1578.43	1642.43	11.2313
167	-1.67	1029.33	899.857		899.857	963.857	46.82																						265	-2.65	1599.86	1663.86	12.9944
168	-1.68	1034.89	907		907	971		-8																					268	-2.68	1621.29	1685.29	13.1328
170	-1.7	1046	921.286		921.286	985.286	48.83	-9																					271	-2.71	1642.71	1706.71	13.9179
172	-1.72	1057.11	935.571		935.571	999.571		-9																					274	-2.74	1664.14	1728.14	15.5363
174	-1.74	1068.22	949.857		949.857	1013.86	52.53	-9																					277	-2.77	1685.57	1749.57	15.8438
176	-1.76	1079.33	964.143		964.143	1028.14		-8																					280	-2.8	1707	1771	14.0148
177	-1.77	1084.89	971.286		971.286	1035.29	46.32																						283	-2.83	1728.43	1792.43	17.5595
178	-1.78	1090.44	978.429		978.429	1042.43		-8																					286	-2.86	1749.86	1813.86	12.5759
180	-1.8	1101.56	992.714		992.714	1056.71	31.43	-7																					289	-2.89	1771.29	1835.29	10.8904
182	-1.82	1112.67	1007		1007	1071		-2																					292	-2.92	1792.71	1856.71	11.761
183	-1.83	1118.22	1014.14		1014.14	1078.14	13.68																						295	-2.95	1814.14	1878.14	10.9162
184	-1.84	1123.78	1021.29		1021.29	1085.29		0																					298	-2.98	1835.57	1899.57	11.7762
186	-1.86	1134.89	1035.57		1035.57	1099.57	10.91	-1																								64
188	-1.88	1146	1049.86		1049.86	1113.86		-4																					312	-3.12	1935.57	1999.57	9.82236
189	-1.89	1151.56	1057		1057	1121	9.04																						315	-3.15	1957	2021	9.84665
190	-1.9	1157.11	1064.14		1064.14	1128.14		0																					318	-3.18	1978.43	2042.43	8.98172
192	-1.92	1168.22	1078.43		1078.43	1142.43	9.67	-4																					321	-3.21	1999.86	2063.86	9.42452
194	-1.94	1179.33	1092.71		1092.71	1156.71		9																					324	-3.24	2021.29	2085.29	9.24943
195	-1.95	1184.89	1099.86		1099.86	1163.86	10.07																						327	-3.27	2042.71	2106.71	9.79938
196	-1.96	1190.44	1107		1107	1171		23																					330	-3.3	2064.14	2128.14	9.50135
198	-1.98	1201.56	1121.29		1121.29	1185.29	13.09	8																					333	-3.33	2085.57	2149.57	9.25
200	-2	1212.67	1135.57		1135.57	1199.57		0																					336	-3.36	2107	2171	9.01926
			-293		-293	-229																							341	-3.41	2142.71	2206.71	10.252
222	-2.22	1334.89	1292.71		1292.71	1356.71		1																					344	-3.44	2164.14	2228.14	10.0209
224	-2.24	1346	1307		1307	1371		2																					347	-3.47	2185.57	2249.57	9.79681
225	-2.25	1351.56	1314.14		1314.14	1378.14	9.85																						350	-3.5	2207	2271	10.0536
226	-2.26	1357.11	1321.29		1321.29	1385.29		-3																					353	-3.53	2228.43	2292.43	9.81818
228	-2.28	1368.22	1335.57		1335.57	1399.57		6																					356	-3.56	2249.86	2313.86	13.6792
230	-2.3	1379.33	1349.86		1349.86	1413.86		59																					359	-3.59	2271.29	2335.29	10.4723
232	-2.32	1390.44	1364.14		1364.14	1428.14		5																					362	-3.62	2292.71	2356.71	10.4137
234	-2.34	1401.56	1378.43		1378.43	1442.43		1																					365	-3.65	2314.14	2378.14	10.6466
236	-2.36	1412.67	1392.71		1392.71	1456.71		35																					368	-3.68	2335.57	2399.57	10.3341
238	-2.38	1423.78	1407		1407	1471		3																					371	-3.71	2357	2421	9.11425
240	-2.4	1434.89	1421.29		1421.29	1485.29		12																					374	-3.74	2378.43	2442.43	9.2952
242	-2.42	1446	1435.57		1435.57	1499.57		16																					377	-3.77	2399.86	2463.86	11.3235
244	-2.44	1457.11	1449.86		1449.86	1513.86		11																					380	-3.8	2421.29	2485.29	9.24092
246	-2.46	1468.22	1464.14		1464.14	1528.14		-2																					387	-3.87	2471.29	2535.29	9.87574
248	-2.48	1479.33	1478.43		1478.43	1542.43		0																					390	-3.9	2492.71	2556.71	11.414
250	-2.5	1490.44	1492.71		1492.71	1556.71		2																					393	-3.93	2514.14	2578.14	10.5814
252	-2.52	1501.56	1507		1507	1571		-1																					396	-3.96	2535.57	2599.57	12.4299
254	-2.54	1512.67	1521.29		1521.29	1585.29		-2																					399	-3.99	2557	2621	13.0769
256	-2.56	1523.78	1535.57		1535.57	1599.57		-3																					402	-4.02	2578.43	2642.43	17.4129
258	-2.58	1534.89	1549.86		1549.86	1613.86		-3																					408	-4.08	2621.29	2685.29	16.885
260	-2.6	1546	1564.14		1564.14	1628.14		4																					411	-4.11	2642.71	2706.71	16.1799
262	-2.62	1557.11	1578.43		1578.43	1642.43		-1																					414	-4.14	2664.14	2728.14	18.3028
264	-2.64	1568.22	1592.71		1592.71	1656.71		-1																					417	-4.17	2685.57	2749.57	13.1726
266	-2.66	1579.33	1607		1607	1671		0																					420	-4.2	2707	2771	17.9245
268	-2.68	1590.44	1621.29		1621.29	1685.29		3																					423	-4.23	2728.43	2792.43	13.445
270	-2.7	1601.56	1635.57		1635.57	1699.57		2																					426	-4.26	2749.86	2813.86	18.4042
272	-2.72	1612.67	1649.86		1649.86	1713.86		0																					429	-4.29	2771.29	2835.29	15.7282
274	-2.74	1623.78	1664.14		1664.14	1728.14		0																					432	-4.32	2792.71	2856.71	16.624
276	-2.76	1634.89	1678.43		1678.43	1742.43		2																					435	-4.35	2814.14	2878.14	16.8715
278	-2.78	1646	1692.71		1692.71	1756.71		-2																					438	-4.38	2835.57	2899.57	20.0718
280	-2.8	1657.11	1707		1707	1771		-4																					441	-4.41	2857	2921	20.9495
282	-2.82	1668.22	1721.29		1721.29	1785.29		-1																					444	-4.44	2878.43	2942.43	26.3359
284	-2.84	1679.33	1735.57		1735.57	1799.57		-5																					447	-4.47	2899.86	2963.86	16.1921
286	-2.86	1690.44	1749.86		1749.86	1813.86		-1																					450	-4.5	2921.29	2985.29	13.0144
288	-2.88	1701.56	1764.14		1764.14	1828.14		5																					453	-4.53	2942.71	3006.71	11.4973
290	-2.9	1712.67	1778.43		1778.43	1842.43		18																					456	-4.56	2964.14	3028.14	14.1361
292	-2.92	1723.78	1792.71		1792.71	1856.71		5																					459	-4.59	2985.57	3049.57	11.7807
294	-2.94	1734.89	1807		1807	1871		0																					462	-4.62	3007	3071	9.26676
296	-2.96	1746	1821.29		1821.29	1885.29		-1																					465	-4.65	3028.43	3092.43	9.60758
298	-2.98	1757.11	1835.57		1835.57	1899.57		1																					468	-4.68	3049.86	3113.86	32.8505
300	-3	1768.22	1849.86		1849.86	1913.86		-5																					471	-4.71	3071.29	3135.29	12.9523
			-293		-293	-229																							474	-4.74	3092.71	3156.71	10.1805
310	-3.1	1823.78	1921.29		1921.29	1985.29		-3																					477	-4.77	3114.14	3178.14	10.418
312	-3.12	1834.89	1935.57		1935.57	1999.57		6																					480	-4.8	3135.57	3199.57	9.81532
314	-3.14	1846	1949.86		1949.86	2013.86		-4																					483	-4.83	3157	3221	15.8387
316	-3.16	1857.11	1964.14		1964.14	2028.14		3																					486	-4.86	3178.43	3242.43	19.2233
318	-3.18	1868.22	1978.43		1978.43	2042.43		13																					489	-4.89	3199.86	3263.86	18.6686
320	-3.2	1879.33	1992.71		1992.71	2056.71		8																					492	-4.92	3221.29	3285.29	22.1328
322	-3.22	1890.44	2007		2007	2071		7																					495	-4.95	3242.71	3306.71	18.479
324	-3.24	1901.56	2021.29		2021.29	2085.29		3																					498	-4.98	3264.14	3328.14	21.5924
326	-3.26	1912.67	2035.57		2035.57	2099.57		3																					505	-5.05	3314.14	3378.14	11.8939
328	-3.28	1923.78	2049.86		2049.86	2113.86		-1																					507	-5.07	3328.43	3392.43	9.22414
330	-3.3	1934.89	2064.14		2064.14	2128.14		2																					510	-5.1	3349.86	3413.86	10.1301
332	-3.32	1946	2078.43		2078.43	2142.43		7																					513	-5.13	3371.29	3435.29	10.7889
334	-3.34	1957.11	2092.71		2092.71	2156.71		3																					516	-5.16	3392.71	3456.71	10.8725
336	-3.36	1968.22	2107		2107	2171		9																					519	-5.19	3414.14	3478.14	9.94652
338	-3.38	1979.33	2121.29		2121.29	2185.29		4																					522	-5.22	3435.57	3499.57	8.77778
340	-3.4	1990.44	2135.57		2135.57	2199.57		4																					525	-5.25	3457	3521	8.74552
342	-3.42	2001.56	2149.86		2149.86	2213.86		2																					528	-5.28	3478.43	3542.43	13.2999
344	-3.44	2012.67	2164.14		2164.14	2228.14		1																					531	-5.31	3499.86	3563.86	8.43913
346	-3.46	2023.78	2178.43		2178.43	2242.43		1																					534	-5.34	3521.29	3585.29	9.65714
348	-3.48	2034.89	2192.71		2192.71	2256.71		0																					537	-5.37	3542.71	3606.71	8.99682
350	-3.5	2046	2207		2207	2271		4																					540	-5.4	3564.14	3628.14	10.6583
352	-3.52	2057.11	2221.29		2221.29	2285.29		1																					546	-5.46	3607	3671	8.22102
354	-3.54	2068.22	2235.57		2235.57	2299.57		6																					549	-5.49	3628.43	3692.43	8.08824
356	-3.56	2079.33	2249.86		2249.86	2313.86		3																					552	-5.52	3649.86	3713.86	8.61833
358	-3.58	2090.44	2264.14		2264.14	2328.14		1																					555	-5.55	3671.29	3735.29	8.60215
360	-3.6	2101.56	2278.43		2278.43	2342.43		6																					558	-5.58	3692.71	3756.71	8.35232
362	-3.62	2112.67	2292.71		2292.71	2356.71		23																					561	-5.61	3714.14	3778.14	8.30292
364	-3.64	2123.78	2307		2307	2371		25																					564	-5.64	3735.57	3799.57	8.14394
366	-3.66	2134.89	2321.29		2321.29	2385.29		5																					567	-5.67	3757	3821	8.13743
368	-3.68	2146	2335.57		2335.57	2399.57		2																					570	-5.7	3778.43	3842.43	8.05009
370	-3.7	2157.11	2349.86		2349.86	2413.86		1																					573	-5.73	3799.86	3863.86	7.95534
372	-3.72	2168.22	2364.14		2364.14	2428.14		15																					576	-5.76	3821.29	3885.29	8.45987
374	-3.74	2179.33	2378.43		2378.43	2442.43		1																					579	-5.79	3842.71	3906.71	9.17431
376	-3.76	2190.44	2392.71		2392.71	2456.71		2																					582	-5.82	3864.14	3928.14	8.13559
378	-3.78	2201.56	2407		2407	2471		19																					585	-5.85	3885.57	3949.57	8.49421
380	-3.8	2212.67	2421.29		2421.29	2485.29		2																					588	-5.88	3907	3971	8.91608
382	-3.82	2223.78	2435.57		2435.57	2499.57		4																					591	-5.91	3928.43	3992.43	8.30292
384	-3.84	2234.89	2449.86		2449.86	2513.86		15																					594	-5.94	3949.86	4013.86	8.06592
386	-3.86	2246	2464.14		2464.14	2528.14		12																					597	-5.97	3971.29	4035.29	8.4991
388	-3.88	2257.11	2478.43		2478.43	2542.43		14																								64
390	-3.9	2268.22	2492.71		2492.71	2556.71		33																					620	-6.2	4135.57	4199.57	8.61461
392	-3.92	2279.33	2507		2507	2571		-1																					623	-6.23	4157	4221		83.0159
394	-3.94	2290.44	2521.29		2521.29	2585.29		8																					626	-6.26	4178.43	4242.43	12.7389
396	-3.96	2301.56	2535.57		2535.57	2599.57		-1																					629	-6.29	4199.86	4263.86	7.97342
398	-3.98	2312.67	2549.86		2549.86	2613.86		-6																					632	-6.32	4221.29	4285.29	7.79167
400	-4	2323.78	2564.14		2564.14	2628.14		-4																					635	-6.35	4242.71	4306.71	7.96875
402	-4.02	2334.89	2578.43		2578.43	2642.43		-3																					638	-6.38	4264.14	4328.14	15.7252
404	-4.04	2346	2578.48		2578.48	2642.48		-4																					643	-6.43	4299.86	4363.86	9.21273
406	-4.06	2357.11	2587.17		2587.17	2651.17		-4																					646	-6.46	4321.29	4385.29	8.82029
408	-4.08	2368.22	2595.87		2595.87	2659.87		-2																					649	-6.49	4342.71	4406.71	9.63222
410	-4.1	2379.33	2604.57		2604.57	2668.57		0																					652	-6.52	4364.14	4428.14	8.78763
412	-4.12	2390.44	2613.26		2613.26	2677.26		0																					655	-6.55	4385.57	4449.57	8.93217
414	-4.14	2401.56	2621.96		2621.96	2685.96		1																					658	-6.58	4407	4471	11.7783
416	-4.16	2412.67	2630.65		2630.65	2694.65		3																					661	-6.61	4428.43	4492.43	18.3612
418	-4.18	2423.78	2639.35		2639.35	2703.35		2																					664	-6.64	4449.86	4513.86	15.959
420	-4.2	2434.89	2648.04		2648.04	2712.04		-3																					667	-6.67	4471.29	4535.29	23.411
422	-4.22	2446	2656.74		2656.74	2720.74		-3																					670	-6.7	4492.71	4556.71	25.5064
424	-4.24	2457.11	2665.43		2665.43	2729.43		0																					673	-6.73	4514.14	4578.14	20.678
426	-4.26	2468.22	2674.13		2674.13	2738.13		-1																					676	-6.76	4535.57	4599.57	23.7687
428	-4.28	2479.33	2682.83		2682.83	2746.83		-1																					679	-6.79	4557	4621	17.6781
430	-4.3	2490.44	2691.52		2691.52	2755.52		0																					682	-6.82	4578.43	4642.43	17.7093
432	-4.32	2501.56	2700.22		2700.22	2764.22		-2																					685	-6.85	4599.86	4663.86	15.127
434	-4.34	2512.67	2708.91		2708.91	2772.91		-4																					688	-6.88	4621.29	4685.29	17.7898
436	-4.36	2523.78	2717.61		2717.61	2781.61		0																					691	-6.91	4642.71	4706.71	15.9477
438	-4.38	2534.89	2726.3		2726.3	2790.3		-3																					694	-6.94	4664.14	4728.14	14.7511
440	-4.4	2546	2735		2735	2799		-3																					697	-6.97	4685.57	4749.57	11.2293
442	-4.42	2557.11	2743.7		2743.7	2807.7		-5																					700	-7	4707	4771	10.8037
444	-4.44	2568.22	2752.39		2752.39	2816.39		-4																								64
446	-4.46	2579.33	2761.09		2761.09	2825.09		-2																					749	-7.49	5057	5121	10.4371
448	-4.48	2590.44	2769.78		2769.78	2833.78		-3																					752	-7.52	5078.43	5142.43	15.5136
450	-4.5	2601.56	2778.48		2778.48	2842.48		-3																					755	-7.55	5099.86	5163.86	8.87097
452	-4.52	2612.67	2787.17		2787.17	2851.17		-3																					758	-7.58	5121.29	5185.29	10.2814
454	-4.54	2623.78	2795.87		2795.87	2859.87		-5																					761	-7.61	5142.71	5206.71	9.45419
456	-4.56	2634.89	2804.57		2804.57	2868.57		-5																					764	-7.64	5164.14	5228.14	7.50951
458	-4.58	2646	2813.26		2813.26	2877.26		-4																					767	-7.67	5185.57	5249.57	7.14908
460	-4.6	2657.11	2821.96		2821.96	2885.96		-3																					770	-7.7	5207	5271	7.21311
462	-4.62	2668.22	2830.65		2830.65	2894.65		-4																					773	-7.73	5228.43	5292.43	7.07876
464	-4.64	2679.33	2839.35		2839.35	2903.35		-4																					776	-7.76	5249.86	5313.86	7.90569
466	-4.66	2690.44	2848.04		2848.04	2912.04		-3																					779	-7.79	5271.29	5335.29	9.74441
468	-4.68	2701.56	2856.74		2856.74	2920.74		-4																					782	-7.82	5292.71	5356.71	6.99172
470	-4.7	2712.67	2865.43		2865.43	2929.43		7																					785	-7.85	5314.14	5378.14	7.39857
472	-4.72	2723.78	2874.13		2874.13	2938.13		-2																					788	-7.88	5335.57	5399.57	7.66917
474	-4.74	2734.89	2882.83		2882.83	2946.83		-4																					791	-7.91	5357	5421	10.4121
476	-4.76	2746	2891.52		2891.52	2955.52		-3																					794	-7.94	5378.43	5442.43	7.91269
478	-4.78	2757.11	2900.22		2900.22	2964.22		-4																					797	-7.97	5399.86	5463.86	9.22844
480	-4.8	2768.22	2908.91		2908.91	2972.91		-2																					800	-8	5421.29	5485.29	13.9535
482	-4.82	2779.33	2917.61		2917.61	2981.61		-3
484	-4.84	2790.44	2926.3		2926.3	2990.3		-5
486	-4.86	2801.56	2935		2935	2999		-4
488	-4.88	2812.67	2943.7		2943.7	3007.7		0
490	-4.9	2823.78	2952.39		2952.39	3016.39		-2
492	-4.92	2834.89	2961.09		2961.09	3025.09		-1
494	-4.94	2846	2969.78		2969.78	3033.78		-2
496	-4.96	2857.11	2978.48		2978.48	3042.48		-1
498	-4.98	2868.22	2987.17		2987.17	3051.17		16
500	-5	2879.33	2995.87		2995.87	3059.87		11
506	-5.06	2912.67	3021.96		3021.96	3085.96		2
508	-5.08	2923.78	3030.65		3030.65	3094.65		3
510	-5.1	2934.89	3039.35		3039.35	3103.35		5
512	-5.12	2946	3048.04		3048.04	3112.04		-3
514	-5.14	2957.11	3056.74		3056.74	3120.74		-4
516	-5.16	2968.22	3065.43		3065.43	3129.43		-1
518	-5.18	2979.33	3074.13		3074.13	3138.13		1
520	-5.2	2990.44	3082.83		3082.83	3146.83		1
522	-5.22	3001.56	3091.52		3091.52	3155.52		-1
524	-5.24	3012.67	3100.22		3100.22	3164.22		34
526	-5.26	3023.78	3108.91		3108.91	3172.91		16
528	-5.28	3034.89	3117.61		3117.61	3181.61		-2
530	-5.3	3046	3126.3		3126.3	3190.3		-2
532	-5.32	3057.11	3135		3135	3199		-2
534	-5.34	3068.22	3143.7		3143.7	3207.7		-3
536	-5.36	3079.33	3152.39		3152.39	3216.39		2
538	-5.38	3090.44	3161.09		3161.09	3225.09		-1
540	-5.4	3101.56	3169.78		3169.78	3233.78		1
542	-5.42	3112.67	3178.48		3178.48	3242.48		26
544	-5.44	3123.78	3187.17		3187.17	3251.17		10
546	-5.46	3134.89	3195.87		3195.87	3259.87		4
548	-5.48	3146	3204.57		3204.57	3268.57		-1
550	-5.5	3157.11	3213.26		3213.26	3277.26		-2
552	-5.52	3168.22	3221.96		3221.96	3285.96		0
554	-5.54	3179.33	3230.65		3230.65	3294.65		27
556	-5.56	3190.44	3239.35		3239.35	3303.35		7
558	-5.58	3201.56	3248.04		3248.04	3312.04		1
560	-5.6	3212.67	3256.74		3256.74	3320.74		1
562	-5.62	3223.78	3265.43		3265.43	3329.43		8
564	-5.64	3234.89	3274.13		3274.13	3338.13		-1
566	-5.66	3246	3282.83		3282.83	3346.83		31
568	-5.68	3257.11	3291.52		3291.52	3355.52		1
570	-5.7	3268.22	3300.22		3300.22	3364.22		0
572	-5.72	3279.33	3308.91		3308.91	3372.91		2
574	-5.74	3290.44	3317.61		3317.61	3381.61		5
576	-5.76	3301.56	3326.3		3326.3	3390.3		27
578	-5.78	3312.67	3335		3335	3399		18
580	-5.8	3323.78	3343.7		3343.7	3407.7		16
582	-5.82	3334.89	3352.39		3352.39	3416.39		9
584	-5.84	3346	3361.09		3361.09	3425.09		1
586	-5.86	3357.11	3369.78		3369.78	3433.78		-3
588	-5.88	3368.22	3378.48		3378.48	3442.48		-2
590	-5.9	3379.33	3387.17		3387.17	3451.17		3
592	-5.92	3390.44	3395.87		3395.87	3459.87		5
594	-5.94	3401.56	3404.57		3404.57	3468.57		3
596	-5.96	3412.67	3413.26		3413.26	3477.26		5
598	-5.98	3423.78	3421.96		3421.96	3485.96		5
600	-6	3434.89	3430.65		3430.65	3494.65		-1
			821.957		821.957	885.957
620	-6.2	3546	3517.61		3517.61	3581.61		7
622	-6.22	3557.11	3526.3		3526.3	3590.3		32
624	-6.24	3568.22	3535		3535	3599		22
626	-6.26	3579.33	3543.7		3543.7	3607.7		23
628	-6.28	3590.44	3552.39		3552.39	3616.39		0
630	-6.3	3601.56	3561.09		3561.09	3625.09		16
632	-6.32	3612.67	3569.78		3569.78	3633.78		5
634	-6.34	3623.78	3578.48		3578.48	3642.48		9
636	-6.36	3634.89	3587.17		3587.17	3651.17		6
638	-6.38	3646	3595.87		3595.87	3659.87		0
640	-6.4	3657.11	3604.57		3604.57	3668.57		11
642	-6.42	3668.22	3613.26		3613.26	3677.26		4
644	-6.44	3679.33	3621.96		3621.96	3685.96		10
646	-6.46	3690.44	3630.65		3630.65	3694.65		3
648	-6.48	3701.56	3639.35		3639.35	3703.35		0
650	-6.5	3712.67	3648.04		3648.04	3712.04		7
652	-6.52	3723.78	3656.74		3656.74	3720.74		82
654	-6.54	3734.89	3665.43		3665.43	3729.43		3
656	-6.56	3746	3674.13		3674.13	3738.13		0
658	-6.58	3757.11	3682.83		3682.83	3746.83		0
660	-6.6	3768.22	3691.52		3691.52	3755.52		4
662	-6.62	3779.33	3700.22		3700.22	3764.22		13
664	-6.64	3790.44	3708.91		3708.91	3772.91		-3
666	-6.66	3801.56	3717.61		3717.61	3781.61		-4
668	-6.68	3812.67	3726.3		3726.3	3790.3		-4
670	-6.7	3823.78	3735		3735	3799		-5
672	-6.72	3834.89	3743.7		3743.7	3807.7		-5
674	-6.74	3846	3752.39		3752.39	3816.39		-6
676	-6.76	3857.11	3761.09		3761.09	3825.09		-5
678	-6.78	3868.22	3769.78		3769.78	3833.78		-4
680	-6.8	3879.33	3778.48		3778.48	3842.48		-6
682	-6.82	3890.44	3787.17		3787.17	3851.17		-5
684	-6.84	3901.56	3795.87		3795.87	3859.87		-3
686	-6.86	3912.67	3804.57		3804.57	3868.57		-3
688	-6.88	3923.78	3813.26		3813.26	3877.26		-4
690	-6.9	3934.89	3821.96		3821.96	3885.96		-5
692	-6.92	3946	3830.65		3830.65	3894.65		1
694	-6.94	3957.11	3839.35		3839.35	3903.35		15
696	-6.96	3968.22	3848.04		3848.04	3912.04		4
698	-6.98	3979.33	3856.74		3856.74	3920.74		34
700	-7	3990.44	3865.43		3865.43	3929.43		16
			821.957		821.957	885.957
726	-7.26	4134.89	3978.48		3978.48	4042.48		5
728	-7.28	4146	3987.17		3987.17	4051.17		8
730	-7.3	4157.11	3995.87		3995.87	4059.87		7
732	-7.32	4168.22	4004.57		4004.57	4068.57		3
734	-7.34	4179.33	4013.26		4013.26	4077.26		2
736	-7.36	4190.44	4021.96		4021.96	4085.96		3
738	-7.38	4201.56	4030.65		4030.65	4094.65		8
740	-7.4	4212.67	4039.35		4039.35	4103.35		2
742	-7.42	4223.78	4048.04		4048.04	4112.04		4
744	-7.44	4234.89	4056.74		4056.74	4120.74		3
746	-7.46	4246	4065.43		4065.43	4129.43		1
748	-7.48	4257.11	4074.13		4074.13	4138.13		-1
750	-7.5	4268.22	4082.83		4082.83	4146.83		0
752	-7.52	4279.33	4091.52		4091.52	4155.52		-2
754	-7.54	4290.44	4100.22		4100.22	4164.22		0
756	-7.56	4301.56	4108.91		4108.91	4172.91		-2
758	-7.58	4312.67	4117.61		4117.61	4181.61		-2
760	-7.6	4323.78	4126.3		4126.3	4190.3		1
762	-7.62	4334.89	4135		4135	4199		24
764	-7.64	4346	4143.7		4143.7	4207.7		5
766	-7.66	4357.11	4152.39		4152.39	4216.39		18
768	-7.68	4368.22	4161.09		4161.09	4225.09		1
770	-7.7	4379.33	4169.78		4169.78	4233.78		4
772	-7.72	4390.44	4178.48		4178.48	4242.48
774	-7.74	4401.56	4187.17		4187.17	4251.17
776	-7.76	4412.67	4195.87		4195.87	4259.87
778	-7.78	4423.78	4204.57		4204.57	4268.57		5
780	-7.8	4434.89	4213.26		4213.26	4277.26		2
782	-7.82	4446	4221.96		4221.96	4285.96		39
784	-7.84	4457.11	4230.65		4230.65	4294.65		42
786	-7.86	4468.22	4239.35		4239.35	4303.35		0
788	-7.88	4479.33	4248.04		4248.04	4312.04		3
790	-7.9	4490.44	4256.74		4256.74	4320.74		2
792	-7.92	4501.56	4265.43		4265.43	4329.43		15
794	-7.94	4512.67	4274.13		4274.13	4338.13		14
796	-7.96	4523.78	4282.83		4282.83	4346.83		57
798	-7.98	4534.89	4291.52		4291.52	4355.52		20
800	-8	4546	4300.22		4300.22	4364.22		20

## Sheet: Totuskey Creek
Depth in core (cm)	meters BSL	Age ybp 1950	Age ybp 2014	Age ybp 2014 Based on figures	TOM	MagSusc (SI Units)
16	-0.16	-34.7778	29.2222	75.8626	19.1608	1.9					y=.0009x-4.5745
17	-0.17	-32.5556	31.4444	82.7592	19.2385	4.6					x=(y+4.5745)/(-.0009)
18	-0.18	-30.3333	33.6667	89.6558	19.0476	0.9
19	-0.19	-28.1111	35.8889	96.5524	19.1161	0.5
20	-0.2	-25.8889	38.1111	103.449	21.0586	0.8
21	-0.21	-23.6667	40.3333	110.346	19.0999	0.6
22	-0.22	-21.4444	42.5556	117.242	18.3057	2
23	-0.23	-19.2222	44.7778	124.139	19.3086	1.6
24	-0.24	-17	47	131.035	17.9396	-3.5
25	-0.25	-14.7778	49.2222	137.932	21.5176	-3.1
26	-0.26	-12.5556	51.4444	144.829	21.3622	-3.1
27	-0.27	-10.3333	53.6667	151.725	18.1208	-2.7
28	-0.28	-8.11111	55.8889	158.622	19.6916	-3.3
29	-0.29	-5.88889	58.1111	165.518	19.6524	5.5
30	-0.3	-3.66667	60.3333	172.415	19.2355	-0.6
31	-0.31	-1.44444	62.5556	179.312	16.5127	-0.5
32	-0.32	0.777778	64.7778	186.208	16.2791	-0.7
33	-0.33	3	67	193.105	15.6956	-0.6
34	-0.34	5.22222	69.2222	200.001	15.942	3.5
35	-0.35	7.44444	71.4444	206.898	16.2981	-2.6
36	-0.36	9.66667	73.6667	213.795	17.1409	-2.6
37	-0.37	11.8889	75.8889	220.691	21.2121	-2.8					y=-.0045x-0.3165
38	-0.38	14.1111	78.1111	227.588	19.0155	-2.6					x=(y+0.3165)/(-.0045)
39	-0.39	16.3333	80.3333	234.484	18.9907	-3.5
40	-0.4	18.5556	82.5556	241.381	19.8695	-1.1
41	-0.41	20.7778	84.7778	248.278	27.0352	0.3
42	-0.42	23	87	255.174	19.697	-3.2
43	-0.43	25.2222	89.2222	262.071	16.997	-4.9
44	-0.44	27.4444	91.4444	268.967	16.3136	-5.4
45	-0.45	29.6667	93.6667	275.864	25.514	-5.1
46	-0.46	31.8889	95.8889	282.761	28.1398	-4.8
47	-0.47	34.1111	98.1111	289.657	27.3405	-5.2
48	-0.48	36.3333	100.333	296.554	26.4931	-5.2
49	-0.49	38.5556	102.556	303.45	24.5336	-5.4
50	-0.5	40.7778	104.778	310.347	29.132	-5.7
51	-0.51	43	107	317.244	32.8313	-5.7
52	-0.52	45.2222	109.222	324.14	36.6751	-6
53	-0.53	47.4444	111.444	331.037	37.1094	-6.1
54	-0.54	49.6667	113.667	337.933	38.4994	-6
55	-0.55	51.8889	115.889	344.83	40.0679	-5.9
56	-0.56	54.1111	118.111	351.727	48.2639	-5.9
57	-0.57	56.3333	120.333	358.623	52.2863	-6.1
58	-0.58	58.5556	122.556	365.52	56.9388	-6				Site	Core	Modern Water Depth (m)	Latitude	Longitude	Source/ Radiocarbon #	Material dated	Labcode	Sample depth in core (m)	**meters BSL	Uncorrected C-14 age	Error	##delta C-13	Calib-Julia-5-18 Median BP 1950	CalibJulia -	Calib Julia +	relative area under probability distribution
59	-0.59	60.7778	124.778	372.416	62.4113	-5.5													0				-64
60	-0.6	63	127	379.313	37.4389	-6.2				Totuskey Creek	RA15-TK-C6*		37.8844	76.7396	This paper	Mollusc	OS-120782	-5.32	-5.32	1620	20	-5.21	1194	72	63	1
61	-0.61	65.2222	129.222	386.21	41.0959	-5.9				Totuskey Creek	RA15-TK-C6*		37.8844	76.7396	This paper	Mollusc	OS-120783	-5.62	-5.62	1610	20	-4.26	1184	81	66	1
62	-0.62	67.4444	131.444	393.106	43.6409	-6.1				Totuskey Creek	RA15-TK-C6*		37.8844	76.7396	This paper	Mollusc	OS-120784	-5.86	-5.86	1560	25	-2.69	1121	78	87	1
63	-0.63	69.6667	133.667	400.003	71.5365	-6
64	-0.64	71.8889	135.889	406.899	55.6008	-5.2				Totuskey Creek	RA15-TK-C9		37.8844	76.7396	This paper	Plant/wood	OS-120824	-9.7	-9.7	5110	20	-24.04	5815	60	10	0.56
65	-0.65	74.1111	138.111	413.796	50.7625	-5.2
66	-0.66	76.3333	140.333	420.693	48.0932	-5
67	-0.67	78.5556	142.556	427.589	53.6524	-5.2
68	-0.68	80.7778	144.778	434.486	59.0234	-5.4
69	-0.69	83	147	441.382	55.6196	-4.4
70	-0.7	85.2222	149.222	448.279	53.0992	-4.4
71	-0.71	87.4444	151.444	455.176	54.6584	-5.1
72	-0.72	89.6667	153.667	462.072	48.951	-5.1
73	-0.73	91.8889	155.889	468.969	58.2278	-5.4
74	-0.74	94.1111	158.111	475.865	50.9852	-4.8
75	-0.75	96.3333	160.333	482.762	48.1567	-5.3
76	-0.76	98.5556	162.556	489.659	39.8533	-5.4
77	-0.77	100.778	164.778	496.555	48.4642	-5.9
78	-0.78	103	167	503.452	49.8783	-6.1
79	-0.79	105.222	169.222	510.348	51.4151	-5.8
80	-0.8	107.444	171.444	517.245	40.4762	-6
81	-0.81	109.667	173.667	524.142	61.157	-6.4
82	-0.82	111.889	175.889	531.038	57.5309	-6.7
83	-0.83	114.111	178.111	537.935	52.5822	-6.9
84	-0.84	116.333	180.333	544.831	54.6618	-6.5
85	-0.85	118.556	182.556	551.728	53.1401	-6.8
86	-0.86	120.778	184.778	558.625	61.4754	-7
87	-0.87	123	187	565.521	56.4334	-7
88	-0.88	125.222	189.222	572.418	50.2008	-7
89	-0.89	127.444	191.444	579.314	48.8281	-6.2
90	-0.9	129.667	193.667	586.211	57.7869	-6.3
91	-0.91	131.889	195.889	593.108	50.9235	-6.2
92	-0.92	134.111	198.111	600.004	51.8519	-6.4
93	-0.93	136.333	200.333	606.901	51.5982	-6.6
94	-0.94	138.556	202.556	613.797	51.1883	-6
95	-0.95	140.778	204.778	620.694	59.2727	-6.5
96	-0.96	143	207	627.591	54.3544	-7
97	-0.97	145.222	209.222	634.487	51.6667	-7.1
98	-0.98	147.444	211.444	641.384	59.7633	-6.6
99	-0.99	149.667	213.667	648.28	59.9338	-4.2
100	-1	151.889	215.889	655.177	55.6338	-5.1
			64	-34.483
122	-1.22	200.778	264.778	806.902	56.7518	-5.6
123	-1.23	203	267	813.799	58.753	-5.7
124	-1.24	205.222	269.222	820.695	56.0575	-5.6
125	-1.25	207.444	271.444	827.592	55.335	-6
126	-1.26	209.667	273.667	834.489	56.8445	-5.7
127	-1.27	211.889	275.889	841.385	47.648	-5.6
128	-1.28	214.111	278.111	848.282	45.0098	-5.8
129	-1.29	216.333	280.333	855.178	45.7143	-5.4
130	-1.3	218.556	282.556	862.075	48.0545	-5.5
131	-1.31	220.778	284.778	868.972	45.1786	-5.4
132	-1.32	223	287	875.868	42.4682	-5.4
133	-1.33	225.222	289.222	882.765	35.4331	-5.1
134	-1.34	227.444	291.444	889.661	38.7844	-5.9
135	-1.35	229.667	293.667	896.558	53.8033	-6
136	-1.36	231.889	295.889	903.455	56.6038	-6.4
137	-1.37	234.111	298.111	910.351	67.4863	-6.2
138	-1.38	236.333	300.333	917.248	66.9192	-6.2
139	-1.39	238.556	302.556	924.144	81.8935	-5.5
140	-1.4	240.778	304.778	931.041	64.1026	-5.5
141	-1.41	243	307	937.938	69.5431	-5.8
142	-1.42	245.222	309.222	944.834	75.3582	-6
143	-1.43	247.444	311.444	951.731	78.5515	-6.1
144	-1.44	249.667	313.667	958.627	81.4961	-5.7
145	-1.45	251.889	315.889	965.524	80.5654	-5.9
146	-1.46	254.111	318.111	972.421	80.916	-6
147	-1.47	256.333	320.333	979.317	80.8824	-6
148	-1.48	258.556	322.556	986.214	77.0609	-6.4
149	-1.49	260.778	324.778	993.11	78.7634	-5.9
150	-1.5	263	327	1000.01	78.9474	-6
151	-1.51	265.222	329.222	1006.9	74.613	-6.2
152	-1.52	267.444	331.444	1013.8	75.1381	-6.4
153	-1.53	269.667	333.667	1020.7	68.8608	-6.2
154	-1.54	271.889	335.889	1027.59	64.0669	-5.7
155	-1.55	274.111	338.111	1034.49	74.6667	-5.9
156	-1.56	276.333	340.333	1041.39	73.2782	-6.3
157	-1.57	278.556	342.556	1048.28	76.8489	-6.3
158	-1.58	280.778	344.778	1055.18	79.7203	-6.7
159	-1.59	283	347	1062.08	81.1728	-5.8
160	-1.6	285.222	349.222	1068.97	82.1429	-6.2
161	-1.61	287.444	351.444	1075.87	79.1183	-6.3
162	-1.62	289.667	353.667	1082.77	80.1431	-6.6
163	-1.63	291.889	355.889	1089.66	79.1086	-6.6
164	-1.64	294.111	358.111	1096.56	78.972	-6.1
165	-1.65	296.333	360.333	1103.46	75.5196	-6.4
166	-1.66	298.556	362.556	1110.35	75.7925	-6.4
167	-1.67	300.778	364.778	1117.25	74.0506	-6.4
168	-1.68	303	367	1124.15	70.4301	-6.5
169	-1.69	305.222	369.222	1131.04	75.5102	-5.7
170	-1.7	307.444	371.444	1137.94	77.3994	-5.9
171	-1.71	309.667	373.667	1144.84	79.0123	-6.2
172	-1.72	311.889	375.889	1151.73	83.6735	-6.2
173	-1.73	314.111	378.111	1158.63	78.9474	-6.4
174	-1.74	316.333	380.333	1165.53	76.3889	-5.6
175	-1.75	318.556	382.556	1172.42	78.5047	-5.7
176	-1.76	320.778	384.778	1179.32	75.5486	-5.8
177	-1.77	323	387	1186.22	74.2424	-6
178	-1.78	325.222	389.222	1193.11	77.439	-6.2
179	-1.79	327.444	391.444	1200.01	79.5139	-5.5
180	-1.8	329.667	393.667	1206.9	75.9124	-5.6
181	-1.81	331.889	395.889	1213.8	76.2846	-5.7
182	-1.82	334.111	398.111	1220.7	77.9592	-5.8
183	-1.83	336.333	400.333	1227.59	72.5664	-5.8
184	-1.84	338.556	402.556	1234.49	64.7436	-4.6
185	-1.85	340.778	404.778	1241.39	72.6667	-5
186	-1.86	343	407	1248.28	75.5932	-5.2
187	-1.87	345.222	409.222	1255.18	72.9839	-5.3
188	-1.88	347.444	411.444	1262.08	71.9697	-5.4
189	-1.89	349.667	413.667	1268.97	77.5701	-4.6
190	-1.9	351.889	415.889	1275.87	74.5928	-5
191	-1.91	354.111	418.111	1282.77	64.2599	-5.2
192	-1.92	356.333	420.333	1289.66	66.2791	-5.2
193	-1.93	358.556	422.556	1296.56	63.7931	-5.3
194	-1.94	360.778	424.778	1303.46	57.4074	-5.5
195	-1.95	363	427	1310.35	48.2517	-4.5
196	-1.96	365.222	429.222	1317.25	47.3154	-5
197	-1.97	367.444	431.444	1324.15	50.8091	-5.1
198	-1.98	369.667	433.667	1331.04	62.069	-5.1
199	-1.99	371.889	435.889	1337.94	56.3863	-5.2
200	-2	374.111	438.111	1344.84	50.3226	-4.6
			64	-34.483
211	-2.11	398.556	462.556	1420.7	44.0729	-5.6
212	-2.12	400.778	464.778	1427.6	37.1134	-5.7
213	-2.13	403	467	1434.49	30.0567	-5.2
214	-2.14	405.222	469.222	1441.39	24.6799	-4.9
215	-2.15	407.444	471.444	1448.29	23.9896	-4.6
216	-2.16	409.667	473.667	1455.18	24.295	-4.6
217	-2.17	411.889	475.889	1462.08	24.4444	-3.2
218	-2.18	414.111	478.111	1468.98	26.1905	-3.7
219	-2.19	416.333	480.333	1475.87	24.4379	-3.1
220	-2.2	418.556	482.556	1482.77	26.3014	-3.7
221	-2.21	420.778	484.778	1489.67	24.821	-3.8
222	-2.22	423	487	1496.56	21.2221	-3.5
223	-2.23	425.222	489.222	1503.46	23.2159	-3.4
224	-2.24	427.444	491.444	1510.36	21.7497	-3.2
225	-2.25	429.667	493.667	1517.25	19.2601	-3.8
226	-2.26	431.889	495.889	1524.15	18.3301	-3.2
227	-2.27	434.111	498.111	1531.05	16.7375	-2.8
228	-2.28	436.333	500.333	1537.94	16.6396	-2.1
229	-2.29	438.556	502.556	1544.84	14.7753	-2.6
230	-2.3	440.778	504.778	1551.74	13.5092	-2.5
231	-2.31	443	507	1558.63	14.6517	-1.6
232	-2.32	445.222	509.222	1565.53	14.5669	-1.8
233	-2.33	447.444	511.444	1572.42	16.0062	-2.1
234	-2.34	449.667	513.667	1579.32	13.0993	-2.9
235	-2.35	451.889	515.889	1586.22	14.6214	-2.5
236	-2.36	454.111	518.111	1593.11		-2.5
237	-2.37	456.333	520.333	1600.01	12.8761	-1.7
238	-2.38	458.556	522.556	1606.91	12.0027	-0.3
239	-2.39	460.778	524.778	1613.8	8.87507	-4.7
240	-2.4	463	527	1620.7	11.7972	-2.6
241	-2.41	465.222	529.222	1627.6	10.9882	1.9
242	-2.42	467.444	531.444	1634.49	8.74384	-0.4
243	-2.43	469.667	533.667	1641.39	9.10202	6.4
244	-2.44	471.889	535.889	1648.29	10.0973	5.9
245	-2.45	474.111	538.111	1655.18	10.2389	1.6
246	-2.46	476.333	540.333	1662.08	9.64912	3.1
247	-2.47	478.556	542.556	1668.98	8.62245	-2.9
248	-2.48	480.778	544.778	1675.87	8.80466	-3.5
249	-2.49	483	547	1682.77	8.2243	1.2
250	-2.5	485.222	549.222	1689.67	8.52149	3.6
251	-2.51	487.444	551.444	1696.56	8.25215	0.6
252	-2.52	489.667	553.667	1703.46	8.35624	1.4
253	-2.53	491.889	555.889	1710.36	8.20707	1.7
254	-2.54	494.111	558.111	1717.25	7.78378	6.1
255	-2.55	496.333	560.333	1724.15	7.97872	8.6
256	-2.56	498.556	562.556	1731.05	10.578	12.4
257	-2.57	500.778	564.778	1737.94	8.52911	5.5
258	-2.58	503	567	1744.84	8.33333	10.9
259	-2.59	505.222	569.222	1751.74	8.30825	4.6
260	-2.6	507.444	571.444	1758.63	7.69724	0.4
261	-2.61	509.667	573.667	1765.53	8.02834	-1.7
262	-2.62	511.889	575.889	1772.43	8.49948	-1.3
263	-2.63	514.111	578.111	1779.32	9.27835	-2.4
264	-2.64	516.333	580.333	1786.22	8.75984	-1
265	-2.65	518.556	582.556	1793.12	8.5213	-0.9
266	-2.66	520.778	584.778	1800.01	8.3266	4
267	-2.67	523	587	1806.91	8.04598	0.6
268	-2.68	525.222	589.222	1813.81	8.12242	0.4
269	-2.69	527.444	591.444	1820.7	7.58209	0.5
270	-2.7	529.667	593.667	1827.6	7.70751	1.5
271	-2.71	531.889	595.889	1834.5	7.10824	3.8
272	-2.72	534.111	598.111	1841.39	7.15726	12.2
273	-2.73	536.333	600.333	1848.29	8.65007	13.1
274	-2.74	538.556	602.556	1855.19	8.5879	27.9
275	-2.75	540.778	604.778	1862.08	8.55759	1
276	-2.76	543	607	1868.98	9.21833	0
277	-2.77	545.222	609.222	1875.88	8.11111	2.1
278	-2.78	547.444	611.444	1882.77	7.67196	-0.8
279	-2.79	549.667	613.667	1889.67	7.47351	2.6
280	-2.8	551.889	615.889	1896.57	7.60803	-0.6
281	-2.81	554.111	618.111	1903.46	7.61394	-1.3
282	-2.82	556.333	620.333	1910.36	7.33823	-0.7
283	-2.83	558.556	622.556	1917.25	7.17368	-1.6
284	-2.84	560.778	624.778	1924.15	7.96411	-1.7
285	-2.85	563	627	1931.05	8.82155	-1.6
286	-2.86	565.222	629.222	1937.94	9.21212	-1.4
287	-2.87	567.444	631.444	1944.84	9.08492	-1.8
288	-2.88	569.667	633.667	1951.74	10.8434	-2.1
289	-2.89	571.889	635.889	1958.63	8.92049	-1.5
290	-2.9	574.111	638.111	1965.53	9.29412	-3.1
291	-2.91	576.333	640.333	1972.43	8.23456	-2
292	-2.92	578.556	642.556	1979.32	7.39056	-2.3
293	-2.93	580.778	644.778	1986.22	8.34688	-2.4
294	-2.94	583	647	1993.12	8.05627	-3.2
295	-2.95	585.222	649.222	2000.01	7.82473	-2.8
296	-2.96	587.444	651.444	2006.91	7.9235	-1.8
297	-2.97	589.667	653.667	2013.81	8.42473	-1.8
298	-2.98	591.889	655.889	2020.7	9.12788	-1.9
299	-2.99	594.111	658.111	2027.6	7.5028	-1.8
300	-3	596.333	660.333	2034.5	8.64473	-2.3
			64	-34.483
303	-3.03	603	667	2055.19	9.19192	-4.9
304	-3.04	605.222	669.222	2062.08	9.64187	-4.2
305	-3.05	607.444	671.444	2068.98	9.36408	-1
306	-3.06	609.667	673.667	2075.88	8.47145	-1.7
307	-3.07	611.889	675.889	2082.77	8.39372	-1.6
308	-3.08	614.111	678.111	2089.67	9.49721	-0.3
309	-3.09	616.333	680.333	2096.57	9.6101	-1.6
310	-3.1	618.556	682.556	2103.46	12.0198	-1.8
311	-3.11	620.778	684.778	2110.36	10.2594	-0.3
312	-3.12	623	687	2117.26	9.28	0.2
313	-3.13	625.222	689.222	2124.15	9.09475	-0.7
314	-3.14	627.444	691.444	2131.05	10.3014	-1.2
315	-3.15	629.667	693.667	2137.95	10.2183	-3.4
316	-3.16	631.889	695.889	2144.84	8.80218	-1.5
317	-3.17	634.111	698.111	2151.74	8.16725	-4.4
318	-3.18	636.333	700.333	2158.64	8.10945	-5.9
319	-3.19	638.556	702.556	2165.53	8.52459	-4.9
320	-3.2	640.778	704.778	2172.43	8.20857	-3.9
321	-3.21	643	707	2179.33	8.49057	-2
322	-3.22	645.222	709.222	2186.22	7.82152	-4.7
323	-3.23	647.444	711.444	2193.12	7.7679	-2.9
324	-3.24	649.667	713.667	2200.02	7.67153	-2.7
325	-3.25	651.889	715.889	2206.91	7.24276	-4.5
326	-3.26	654.111	718.111	2213.81	7.36897	-4.9
327	-3.27	656.333	720.333	2220.71	7.36842	-4.4
328	-3.28	658.556	722.556	2227.6	7.42358	-4.7
329	-3.29	660.778	724.778	2234.5	7.46888	-3.4
330	-3.3	663	727	2241.39	7.69231	-3.5
331	-3.31	665.222	729.222	2248.29	7.41294	-2.1
332	-3.32	667.444	731.444	2255.19	7.68072	-2.5
333	-3.33	669.667	733.667	2262.08	7.64618	-0.3
334	-3.34	671.889	735.889	2268.98	7.24907	-1.8
335	-3.35	674.111	738.111	2275.88	7.33189	-3.8
336	-3.36	676.333	740.333	2282.77	7.28689	-1.8
337	-3.37	678.556	742.556	2289.67	7.60659	-3.2
338	-3.38	680.778	744.778	2296.57	7.36473	-2.5
339	-3.39	683	747	2303.46	7.30464	-2.5
340	-3.4	685.222	749.222	2310.36	7.70335	-1.9
341	-3.41	687.444	751.444	2317.26	7.62787	-1.2
342	-3.42	689.667	753.667	2324.15	11.8929	-2.4
343	-3.43	691.889	755.889	2331.05	11.7179	-1.1
344	-3.44	694.111	758.111	2337.95	7.91398	-1.3
345	-3.45	696.333	760.333	2344.84	7.76903	-0.2
346	-3.46	698.556	762.556	2351.74	6.84189	0.1
347	-3.47	700.778	764.778	2358.64	7.08333	0.2
348	-3.48	703	767	2365.53	7.08698	-2
349	-3.49	705.222	769.222	2372.43	6.95742	1.4
350	-3.5	707.444	771.444	2379.33	6.98492	1
351	-3.51	709.667	773.667	2386.22	6.97566	1.2
352	-3.52	711.889	775.889	2393.12	6.9375	1.6
353	-3.53	714.111	778.111	2400.02	7.0018	0.9
354	-3.54	716.333	780.333	2406.91	7.4095	-1.9
355	-3.55	718.556	782.556	2413.81	7.21344	-4.5
356	-3.56	720.778	784.778	2420.71	7.289	-0.5
357	-3.57	723	787	2427.6	7.37756	1.4
358	-3.58	725.222	789.222	2434.5	8.42839	0.9
359	-3.59	727.444	791.444	2441.4	8.58931	-0.1
360	-3.6	729.667	793.667	2448.29	8.2954	-1.5
361	-3.61	731.889	795.889	2455.19	7.41608	-0.5
362	-3.62	734.111	798.111	2462.09	7.96837	2
363	-3.63	736.333	800.333	2468.98	7.79302	1.4
364	-3.64	738.556	802.556	2475.88	7.72603	0.7
365	-3.65	740.778	804.778	2482.78	7.49757	0.9
366	-3.66	743	807	2489.67	7.4255	1.1
367	-3.67	745.222	809.222	2496.57	7.27662	0.7
368	-3.68	747.444	811.444	2503.47	7.19162	4.5
369	-3.69	749.667	813.667	2510.36	7.00371	0.3
370	-3.7	751.889	815.889	2517.26	6.39229	0.6
371	-3.71	754.111	818.111	2524.16	6.96138	0.4
372	-3.72	756.333	820.333	2531.05	6.80894	1.4
373	-3.73	758.556	822.556	2537.95	6.57819	-3.3
374	-3.74	760.778	824.778	2544.85	6.78271	-0.2
375	-3.75	763	827	2551.74	7.12919	0.2
376	-3.76	765.222	829.222	2558.64	7.36842	-0.6
377	-3.77	767.444	831.444	2565.54	8.18584	-1.8
378	-3.78	769.667	833.667	2572.43	8.10509	1.2
379	-3.79	771.889	835.889	2579.33	7.63533	0.7
380	-3.8	774.111	838.111	2586.22	7.91367	0.8
381	-3.81	776.333	840.333	2593.12	8.44415	-0.4
382	-3.82	778.556	842.556	2600.02	8.10948	-3.6
383	-3.83	780.778	844.778	2606.91	8.26682	-2.8
384	-3.84	783	847	2613.81	8.32834	-2.1
385	-3.85	785.222	849.222	2620.71	9.36422	-1.2
386	-3.86	787.444	851.444	2627.6	8.1478	-3.3
387	-3.87	789.667	853.667	2634.5	8.79464	-2.1
388	-3.88	791.889	855.889	2641.4	7.67219	-4.4
389	-3.89	794.111	858.111	2648.29	8.13524	-0.1
390	-3.9	796.333	860.333	2655.19	8.37506	-1.2
391	-3.91	798.556	862.556	2662.09	8.64913	-2.7
392	-3.92	800.778	864.778	2668.98	7.53012	-2.3
393	-3.93	803	867	2675.88	7.66262	-3.3
394	-3.94	805.222	869.222	2682.78	7.87129	-3.9
395	-3.95	807.444	871.444	2689.67	7.56713	-3
396	-3.96	809.667	873.667	2696.57	8.21073	-0.6
397	-3.97	811.889	875.889	2703.47	7.75229	-1.7
398	-3.98	814.111	878.111	2710.36	9.12791	-1.8
399	-3.99	816.333	880.333	2717.26	7.98403	1.8
400	-4	818.556	882.556	2724.16	7.34418	6.3
			64	-34.483
404	-4.04	827.444	891.444	2751.74	7.76183	-0.5
405	-4.05	829.667	893.667	2758.64	8.17908	1.6
406	-4.06	831.889	895.889	2765.54	7.94791	1.4
407	-4.07	834.111	898.111	2772.43	7.70698	2
408	-4.08	836.333	900.333	2779.33	7.5335	0.9
409	-4.09	838.556	902.556	2786.23	7.79504	1.3
410	-4.1	840.778	904.778	2793.12	7.89374	1.4
411	-4.11	843	907	2800.02	7.79703	1.7
412	-4.12	845.222	909.222	2806.92	8.1254	2.3
413	-4.13	847.444	911.444	2813.81	7.93766	0.6
414	-4.14	849.667	913.667	2820.71	8.3944	1.6
415	-4.15	851.889	915.889	2827.61	7.47433	-1
416	-4.16	854.111	918.111	2834.5	7.23839	-0.7
417	-4.17	856.333	920.333	2841.4	7.53904	2
418	-4.18	858.556	922.556	2848.3	7.89916	1.3
419	-4.19	860.778	924.778	2855.19	7.97508	1.8
420	-4.2	863	927	2862.09	8.51178	1.1
421	-4.21	865.222	929.222	2868.99	8.41555	-1.1
422	-4.22	867.444	931.444	2875.88	8.78848	-0.4
423	-4.23	869.667	933.667	2882.78	7.93043	-1.1
424	-4.24	871.889	935.889	2889.68	8.13953	3.6
425	-4.25	874.111	938.111	2896.57	7.88516	-1.5
426	-4.26	876.333	940.333	2903.47	7.59207	-2.1
427	-4.27	878.556	942.556	2910.37	7.24198	-1.7
428	-4.28	880.778	944.778	2917.26	7.66257	-0.6
429	-4.29	883	947	2924.16	7.35908	2.3
430	-4.3	885.222	949.222	2931.05	7.11297	1.2
431	-4.31	887.444	951.444	2937.95	6.95245	1.3
432	-4.32	889.667	953.667	2944.85	6.57631	-2.1
433	-4.33	891.889	955.889	2951.74	6.23782	1.9
434	-4.34	894.111	958.111	2958.64	6.03546	6.2
435	-4.35	896.333	960.333	2965.54	6.56501	6.1
436	-4.36	898.556	962.556	2972.43	6.46581	-2
437	-4.37	900.778	964.778	2979.33	6.45756	-1.9
438	-4.38	903	967	2986.23	7.17767	3.1
439	-4.39	905.222	969.222	2993.12	7.01754	4
440	-4.4	907.444	971.444	3000.02	7.88991	4.5
441	-4.41	909.667	973.667	3006.92	6.83091	0.1
442	-4.42	911.889	975.889	3013.81	6.43807	-3.2
443	-4.43	914.111	978.111	3020.71	6.7833	0.5
444	-4.44	916.333	980.333	3027.61	6.90141	1
445	-4.45	918.556	982.556	3034.5	7.11111	3.2
446	-4.46	920.778	984.778	3041.4	6.9194	1.5
447	-4.47	923	987	3048.3	7.07246	2.1
448	-4.48	925.222	989.222	3055.19	7.02355	0.5
449	-4.49	927.444	991.444	3062.09	7.0887	3.4
450	-4.5	929.667	993.667	3068.99	6.86441	5.4
451	-4.51	931.889	995.889	3075.88	7.10608	-1.4
452	-4.52	934.111	998.111	3082.78	7.18654	0.3
453	-4.53	936.333	1000.33	3089.68	7.27412	4.2
454	-4.54	938.556	1002.56	3096.57	6.98292	1.8
455	-4.55	940.778	1004.78	3103.47	7.44681	3.7
456	-4.56	943	1007	3110.37	7.44921	3.2
457	-4.57	945.222	1009.22	3117.26	7.17634	2.5
458	-4.58	947.444	1011.44	3124.16	8.08407	-0.1
459	-4.59	949.667	1013.67	3131.06	9.08397	2.4
460	-4.6	951.889	1015.89	3137.95	8.47275	3.6
461	-4.61	954.111	1018.11	3144.85	8.83929	2.9
462	-4.62	956.333	1020.33	3151.75	8.08436	3.7
463	-4.63	958.556	1022.56	3158.64	8.12633	4.1
464	-4.64	960.778	1024.78	3165.54	8.36166	3.9
465	-4.65	963	1027	3172.44	6.76692	2.9
466	-4.66	965.222	1029.22	3179.33	6.98555	4.7
467	-4.67	967.444	1031.44	3186.23	6.76749	1.9
468	-4.68	969.667	1033.67	3193.13	6.95297	0.6
469	-4.69	971.889	1035.89	3200.02	6.8917	-0.8
470	-4.7	974.111	1038.11	3206.92	7.37163	-0.4
471	-4.71	976.333	1040.33	3213.82	7.06662	-1.4
472	-4.72	978.556	1042.56	3220.71	6.87567	0.7
473	-4.73	980.778	1044.78	3227.61	6.58318	-1.3
474	-4.74	983	1047	3234.51	6.46971	3.2
475	-4.75	985.222	1049.22	3241.4	6.32911	3.3
476	-4.76	987.444	1051.44	3248.3	6.59454	5.1
477	-4.77	989.667	1053.67	3255.2	5.16627	5.2
478	-4.78	991.889	1055.89	3262.09	6.539	5
479	-4.79	994.111	1058.11	3268.99	5.90452	5.4
480	-4.8	996.333	1060.33	3275.88	5.98227	5.5
481	-4.81	998.556	1062.56	3282.78	5.96677	5.3
482	-4.82	1000.78	1064.78	3289.68	6.20577	3
483	-4.83	1003	1067	3296.57	7.51409	1
484	-4.84	1005.22	1069.22	3303.47	8.42167	4.7
485	-4.85	1007.44	1071.44	3310.37	7.49671	0.5
486	-4.86	1009.67	1073.67	3317.26	7.24689	0.1
487	-4.87	1011.89	1075.89	3324.16	6.96702	8.2
488	-4.88	1014.11	1078.11	3331.06	6.83359	1.2
489	-4.89	1016.33	1080.33	3337.95	7.68392	5.6
490	-4.9	1018.56	1082.56	3344.85	6.80653	5.9
491	-4.91	1020.78	1084.78	3351.75	6.12436	4.2
492	-4.92	1023	1087	3358.64	5.80251	5.7
493	-4.93	1025.22	1089.22	3365.54	6.33312	5
494	-4.94	1027.44	1091.44	3372.44	5.94512	4.8
495	-4.95	1029.67	1093.67	3379.33	6.09418	3.4
496	-4.96	1031.89	1095.89	3386.23	7.03408	6
497	-4.97	1034.11	1098.11	3393.13	6.2167	4.5
498	-4.98	1036.33	1100.33	3400.02	12.1189	4.2
499	-4.99	1038.56	1102.56	3406.92	6.2586	4.1
500	-5	1040.78	1104.78	3413.82	6.93374	11.4
501	-5.01	1043	1107	3420.71	7.06714	4.5
502	-5.02	1045.22	1109.22	3427.61	7.24479	4.3
503	-5.03	1047.44	1111.44	3434.51	6.57973	3.7
504	-5.04	1049.67	1113.67	3441.4	6.49026	4.2
505	-5.05	1051.89	1115.89	3448.3	6.16592	1.9
506	-5.06	1054.11	1118.11	3455.2	6.05802	4.9
507	-5.07	1056.33	1120.33	3462.09	5.99688	5.5
508	-5.08	1058.56	1122.56	3468.99	6.06431	3.3
509	-5.09	1060.78	1124.78	3475.89	5.85271	4.7
510	-5.1	1063	1127	3482.78	5.89607	4.4
511	-5.11	1065.22	1129.22	3489.68	5.67063	5.8
512	-5.12	1067.44	1131.44	3496.58	5.67197	-0.2
513	-5.13	1069.67	1133.67	3503.47	5.97923	6
514	-5.14	1071.89	1135.89	3510.37	4.90226	7.7
515	-5.15	1074.11	1138.11	3517.27	4.36242	7.7
516	-5.16	1076.33	1140.33	3524.16	3.64794	1.8
517	-5.17	1078.56	1142.56	3531.06	4.75228	7.7
518	-5.18	1080.78	1144.78	3537.96	5.62357	2.3
519	-5.19	1083	1147	3544.85	6.20079	5.4
520	-5.2	1085.22	1149.22	3551.75	6.75749	4.3
521	-5.21	1087.44	1151.44	3558.65	7.66667	5.3
522	-5.22	1089.67	1153.67	3565.54	5.32544	5
523	-5.23	1091.89	1155.89	3572.44	5.47855	1.3
524	-5.24	1094.11	1158.11	3579.34	5.39337	0.4
525	-5.25	1096.33	1160.33	3586.23	5.57202	6.2
526	-5.26	1098.56	1162.56	3593.13	5.56757	6.6
527	-5.27	1100.78	1164.78	3600.03	6.75991	6.4
528	-5.28	1103	1167	3606.92	5.76497	5.9
529	-5.29	1105.22	1169.22	3613.82	6.04855	3.5
530	-5.3	1107.44	1171.44	3620.71	5.50503	6.4
531	-5.31	1109.67	1173.67	3627.61	5.34759	6.5
532	-5.32	1111.89	1175.89	3634.51	5.82267	3.8
533	-5.33	1114.11	1178.11	3641.4	5.6684	1.8
534	-5.34	1116.33	1180.33	3648.3	5.61024	8.7
535	-5.35	1118.56	1182.56	3655.2	5.61865	5.3
536	-5.36	1120.78	1184.78	3662.09	5.4975	5.5
537	-5.37	1123	1187	3668.99	6.14224	6.3
538	-5.38	1125.22	1189.22	3675.89	6.34376	5.6
539	-5.39	1127.44	1191.44	3682.78	6.50038	4.8
540	-5.4	1129.67	1193.67	3689.68	5.82404	6.8
541	-5.41	1131.89	1195.89	3696.58	5.23332	7.9
542	-5.42	1134.11	1198.11	3703.47	5.46946	6.5
543	-5.43	1136.33	1200.33	3710.37	5.01022	7.1
544	-5.44	1138.56	1202.56	3717.27	5.52834	6
545	-5.45	1140.78	1204.78	3724.16	5.35133	6.7
546	-5.46	1143	1207	3731.06	4.67742	6.4
547	-5.47	1145.22	1209.22	3737.96	4.91932	4.8
548	-5.48	1147.44	1211.44	3744.85	4.65861	7.8
549	-5.49	1149.67	1213.67	3751.75	6.26362	4.9
550	-5.5	1151.89	1215.89	3758.65	4.16013	6.6
551	-5.51	1154.11	1218.11	3765.54	5.49451	8
552	-5.52	1156.33	1220.33	3772.44	4.73131	7.3
553	-5.53	1158.56	1222.56	3779.34	4.66978	9.3
554	-5.54	1160.78	1224.78	3786.23	4.95948	7.4
555	-5.55	1163	1227	3793.13	5.17128	7.5
556	-5.56	1165.22	1229.22	3800.03	5.97494	8.1
557	-5.57	1167.44	1231.44	3806.92	6.52908	8
558	-5.58	1169.67	1233.67	3813.82	5.56333	3.5
559	-5.59	1171.89	1235.89	3820.72	5.28042	6.6
560	-5.6	1174.11	1238.11	3827.61	5.60586	7.6
561	-5.61	1176.33	1240.33	3834.51	5.00636	7.4
562	-5.62	1178.56	1242.56	3841.41	5.2039	4.1
563	-5.63	1180.78	1244.78	3848.3	5.28455	6.1
564	-5.64	1183	1247	3855.2	4.90903	6.9
565	-5.65	1185.22	1249.22	3862.1	4.93352	4.5
566	-5.66	1187.44	1251.44	3868.99	4.54545	4.2
567	-5.67	1189.67	1253.67	3875.89	5.19802	6.2
568	-5.68	1191.89	1255.89	3882.79	6.10991	5.8
569	-5.69	1194.11	1258.11	3889.68	6.61388	4.9
570	-5.7	1196.33	1260.33	3896.58	6.67816	3
571	-5.71	1198.56	1262.56	3903.48	6.26087	4.4
572	-5.72	1200.78	1264.78	3910.37	6.66667	4.3
573	-5.73	1203	1267	3917.27	7.64642	-0.8
574	-5.74	1205.22	1269.22	3924.17	7.43073	2
575	-5.75	1207.44	1271.44	3931.06	6.93227	-0.2
576	-5.76	1209.67	1273.67	3937.96	6.75935	1
577	-5.77	1211.89	1275.89	3944.86	6.79612	2.8
578	-5.78	1214.11	1278.11	3951.75	6.49351	4.7
579	-5.79	1216.33	1280.33	3958.65	6.07861	2.4
580	-5.8	1218.56	1282.56	3965.54	5.97952	1.7
581	-5.81	1220.78	1284.78	3972.44	6.32911	1.7
582	-5.82	1223	1287	3979.34	6.27219	-1.9
583	-5.83	1225.22	1289.22	3986.23	5.9322	4.2
584	-5.84	1227.44	1291.44	3993.13	5.95441	3.2
585	-5.85	1229.67	1293.67	4000.03	6.02968	0
586	-5.86	1231.89	1295.89	4006.92	6.46512	9.6
587	-5.87	1234.11	1298.11	4013.82	5.94982	4
588	-5.88	1236.33	1300.33	4020.72	7.38946	4.6
589	-5.89	1238.56	1302.56	4027.61	14.9208	8.8
590	-5.9	1240.78	1304.78	4034.51	17.7641	0.5
591	-5.91	1243	1307	4041.41	8.7573	2.9
592	-5.92	1245.22	1309.22	4048.3	7.22178	0.9
593	-5.93	1247.44	1311.44	4055.2	7.09849	5.6
594	-5.94	1249.67	1313.67	4062.1	6.85907	1.8
595	-5.95	1251.89	1315.89	4068.99	6.7541	6.6
596	-5.96	1254.11	1318.11	4075.89	6.32518	7.4
597	-5.97	1256.33	1320.33	4082.79	6.01557	7.3
598	-5.98	1258.56	1322.56	4089.68	5.8855	6
599	-5.99	1260.78	1324.78	4096.58	6.0241	5.7
600	-6	1263	1327	4103.48	6.33377	6.2
